1 **Conserved secreted effectors determine endophytic growth and multi-host plant**  
2 **compatibility in a vascular wilt fungus**

3  
4 Amey Redkar<sup>1\*</sup>, Mugdha Sabale<sup>1</sup>, Christian Schudoma<sup>2†</sup>, Bernd Zechmann<sup>3</sup>, Yogesh K.  
5 Gupta<sup>4</sup>, Manuel S. López-Berges<sup>1</sup>, Giovanni Venturini<sup>1‡</sup>, Selena Gimenez-Ibanez<sup>5</sup>, David  
6 Turrà<sup>6</sup>, Roberto Solano<sup>5</sup>, Antonio Di Pietro<sup>1\*</sup>

7  
8 <sup>1</sup> Departamento de Genética, Universidad de Córdoba, 14071 Córdoba, Spain

9 <sup>2</sup> Earlham Institute, Norwich Research Park, Colney Lane, Norwich, NR4 7UZ, United  
10 Kingdom

11 <sup>3</sup> Baylor University, Center for Microscopy and Imaging, Waco, Texas 76798, USA

12 <sup>4</sup> The Sainsbury Laboratory, Norwich Research Park, Colney Lane, Norwich, NR4 7UH, United  
13 Kingdom

14 <sup>5</sup> Plant Molecular Genetics Department, Centro Nacional de Biotecnología-CSIC (CNB-CSIC),  
15 28049 Madrid, Spain

16 <sup>6</sup> Department of Agriculture and Center for Studies on Bioinspired Agro-environmental  
17 Technology, Università di Napoli Federico II, 80055 Portici, Italy

18

19 \*Correspondence: A. Redkar [ge2rerea@uco.es](mailto:ge2rerea@uco.es); A. Di Pietro [ge2dipia@uco.es](mailto:ge2dipia@uco.es)

20

21

22

23

24 Current address:

25 † European Molecular Biology Laboratory (EMBL), Structural and Computational Biology  
26 Unit, Meyerhofstraße 1, 69117 Heidelberg, Germany

27 ‡ Isagro S.p.A. Centro Ricerche, Via Giacomo Fauser 28, 28100 Novara, Italy

28

29

30

31

32

33

34

35

36 **Abstract:**

37 Fungal interactions with plant roots, either beneficial or detrimental, have a major impact on  
38 agriculture and ecosystems. The soil inhabiting ascomycete *Fusarium oxysporum* (Fo)  
39 constitutes a species complex of worldwide distribution causing vascular wilt in more than a  
40 hundred different crops. Individual isolates of the fungus exhibit host-specific pathogenicity,  
41 determined by proteinaceous effectors termed secreted in xylem (SIX). However, such isolates  
42 can also colonize roots of non-host plants asymptotically as endophytes, or even protect  
43 them against pathogenic isolates. The molecular determinants of multi-host plant colonization  
44 are currently unknown. Here, we identified a set of fungal effectors termed ERCs (Early Root  
45 Compatibility effectors), which are secreted during early biotrophic growth of Fo on both host  
46 and non-host plants. In contrast to the strain-specific SIX effectors, which are encoded on  
47 accessory genomic regions, ERCs are encoded on core regions and are found across the entire  
48 Fo species complex as well as in other phytopathogens, suggesting a conserved role in fungus-  
49 plant associations. Targeted deletion of ERC genes in a pathogenic Fo isolate resulted in  
50 reduced virulence on the host plant and rapid activation of plant immune responses, while in a  
51 non-pathogenic isolate it led to impaired root colonization and loss of biocontrol ability.  
52 Strikingly, some ERCs also contribute to Fo infection on the non-vascular land plant  
53 *Marchantia polymorpha*. Our results reveal an evolutionarily conserved mechanism for multi-  
54 host colonization by root infecting fungi.

55

56

57

58

59

60

61

62

63

64

65

66

67

68

69

## 70 Main Text

### 71 Introduction

72 Pathogenic microorganisms have evolved to infect both aerial as well as below-ground  
73 organs resulting in devastating losses of agricultural yield (1). Some pathogenic species target  
74 the host vasculature resulting in systemic infections, while others remain restricted to  
75 nonvascular tissues, causing localized disease symptoms. These interactions are the result of  
76 distinct adaptations allowing pathogens to accommodate themselves inside the plant host and  
77 dampen the immune response through secreted molecules termed effectors (2). Effectors  
78 function either in the intercellular space (apoplast) or inside the host cells to reprogram plant  
79 processes (3). Plants in turn, have evolved a multi-layered immune system to resist the  
80 microbial invaders and thwart pathogen success (4, 5).

81 Vascular wilt fungi constitute a particularly destructive group of soil-borne pathogens,  
82 which attack almost every crop except cereals and are extremely difficult to control (6). The  
83 *Fusarium oxysporum* (Fo) species complex provokes devastating losses in global agriculture(7,  
84 8), exemplified by the highly aggressive clone named tropical race 4 (TR4) that threatens to  
85 wipe out the world's industrial Cavendish banana production (9). Fo infection initiates in the  
86 soil, when the fungus senses chemical signals released by roots that trigger directed hyphal  
87 growth towards the plant (10). After entering the plant, Fo grows mainly between the cells of  
88 the root cortex. During this symptomless biotrophic stage, establishment of infection depends  
89 on conserved fungal compatibility mechanisms such as a mitogen-activated protein kinase  
90 cascade controlling invasive growth (11) or Rapid Alkalization Factor (RALF), a small  
91 secreted protein mimicking plant regulatory peptides that trigger host alkalization (12). In a  
92 compatible pathogen-host interaction, Fo eventually enters and colonizes the xylem vessels,  
93 causing characteristic vascular wilt symptoms and plant death (7).

94 A long standing question concerns the molecular determinants of host range during the  
95 asymptomatic endophytic phase. Although the Fo species complex collectively infects more  
96 than a hundred different crops, individual isolates only cause wilt disease on a single or a few  
97 related plant species and have accordingly been classified into formae speciales (ff. spp.) (13,  
98 14). Host-specific pathogenicity is conferred by accessory or lineage specific (LS) genomic  
99 regions, which encode unique combinations of virulence determinants and can be horizontally  
100 transferred between Fo isolates (14, 15). Many of these host-specific effector proteins were  
101 originally identified in the xylem sap of infected plants and are thus known as SIX (Secreted  
102 In Xylem) effectors (16-18). How SIX effectors determine host specificity is not fully  
103 understood, although some were shown to suppress host Pattern Triggered Immunity (PTI) and

104 also function as avirulence genes in Effector Triggered Immunity (ETI) through recognition  
105 by host resistance (*R*) genes (7,19-21).

106 Besides causing wilt disease on their respective host species, Fo isolates can also colonize  
107 the roots of other plants where they survive asymptotically as endophytes or even act as  
108 biocontrol agents to protect the plant against pathogenic Fo forms or other root pathogens (22-  
109 25). The genetic determinants underlying multi-host asymptomatic root compatibility in Fo  
110 remain unclear. In this study we investigated how Fo establishes multi-host root compatibility  
111 independent of its colonization lifestyle, be it pathogenic or endophytic. By analyzing the  
112 apoplastic fluid of infected roots, we identified a set of Early Root Compatibility (ERC)  
113 effectors, which are secreted during early biotrophic growth on both host and non-host plants  
114 and are found across the entire Fo species complex as well as in other fungal phytopathogens.  
115 Interestingly, ERCs also contribute to Fo infection on an evolutionarily distant non-vascular  
116 plant suggesting a broadly conserved role in fungus-root interaction.

117

## 118 **Results**

### 119 ***F. oxysporum* colonizes roots of host as well as non-host plants**

120 Fo isolates are known to colonize the roots of both host and non-host plants. At present  
121 the molecular basis of asymptomatic non-host invasion as opposed to vascular colonization  
122 and wilting remains largely unknown. To address this question, we first tested the ability of a  
123 set of Fo reference isolates sequenced by the Broad Institute Fusarium Comparative Genome  
124 Initiative (FCGI) to colonize a single plant species, tomato (table S1). The set includes several  
125 plant pathogenic ff. spp. infecting tomato, melon, pea, banana or crucifer species, as well as a  
126 non-pathogenic biocontrol isolate (24). All tested isolates were detected by real time  
127 quantitative PCR (qRT-PCR) in roots and root crowns of tomato plants at 35 days post  
128 inoculation (dpi), while only the tomato pathogenic isolate (f. sp. *lycopersici*) was found in the  
129 stems (fig. S1A). Confocal microscopy of tomato roots inoculated with fluorescent mClover3-  
130 labelled strains of the tomato pathogenic isolate Fol4287 (f. sp. *lycopersici*), the banana  
131 pathogenic isolate Foc54006 (f. sp. *cubense*) or the non-pathogenic biocontrol strain Fo47,  
132 confirmed the presence of fungal hyphae of all three strains which efficiently colonized the  
133 tomato root cortex (Fig. 1A). Moreover, transmission electron microscopy (TEM) of Fol4287  
134 infected plants at 3 dpi revealed that the fungus localized predominantly to the apoplast of root  
135 cortical cells, although occasional penetration events of cortical and endodermal cells were  
136 observed, accompanied by a loss of plant plasma membrane integrity (Fig. 1B and fig. S1B).  
137 Again, qRT-PCR detected the presence of all three Fo isolates in tomato roots at 12 dpi, while

138 only the tomato pathogenic isolate Fo14287 was detected in the stems (Fig. 1C). Collectively,  
139 these results confirm that Fo isolates have a general capacity to colonize roots of both host and  
140 non-host plants, which is in line with earlier reports (23). Our results also show that Fo  
141 colonization of non-host plants remains mostly restricted to roots and root crowns while the  
142 host-specific forms of the fungus are able to invade the stems to cause vascular wilt and plant  
143 death.

144

#### 145 ***F. oxysporum* secretes a battery of core effector proteins in the root intercellular space**

146 During plant infection, pathogenic and mutualistic fungi secrete effectors to modulate  
147 host responses (2). Some effectors are highly specific for a given pathogen species while others  
148 are conserved across a broad range of fungal pathogens and endophytes (26). Given the  
149 predominantly apoplastic growth of Fo during the early biotrophic stage (Fig.1, A and B), we  
150 performed discovery proteomics of tomato root apoplastic fluid (AF) collected at 3 dpi to  
151 search for potential effectors. Liquid chromatography-mass spectrometry (LC-MS) analysis  
152 identified a total of 72 Fo14287 proteins present in AF, 32 of which were consistently detected  
153 across three biological replicates (Fig. 1D, fig. S1C and D, Data S1). Twenty-five of the 72  
154 apoplastic fungal proteins were also found in the filtrates of axenically grown fungal cultures,  
155 while 47 were only detected *in planta* (Data S1). The latter include different classes of cell wall  
156 degrading enzymes such as polygalacturonase, pectate lyase, glucanase or galactosidase, as  
157 well as other enzymes such as a choline dehydrogenase, a copper amine oxidase or a carbonic  
158 anhydrase (CA). CAs were previously associated with pH adaptation, CO<sub>2</sub>-sensing and  
159 virulence of fungal pathogens of humans such as *Cryptococcus neoformans* (27). Moreover,  
160 plant CAs were recently shown to regulate basal immune responses in tomato (28).  
161 Interestingly, while CAs from human fungal pathogens belong to the beta-CA class and lack a  
162 secretion signal (29), the Fo CA identified in AF belongs to the poorly characterized alpha-  
163 CA class and carries a signal peptide, suggesting a possible adaptation to the plant pathogenic  
164 lifestyle.

165 In an attempt to identify *bona fide* effector candidates we looked for proteins that 1) were  
166 specifically present in AF; 2) were consistently detected in all three biological AF replicates;  
167 3) contain a predicted N-terminal secretion signal peptide; 4) lack predicted transmembrane  
168 domains; 5) contain multiple cysteines. Four of the identified Fo proteins fulfilling all five  
169 criteria were selected for further analysis and named Early Root Compatibilty (ERCs)  
170 effectors (Fig. 1D, fig. S1E and F, Data S1). ERC1 (FOXG\_11583) carries a putative cellulose-  
171 binding domain (30), while ERC3 (FOXG\_16902) has a  $\alpha$ -L-arabinofuranosidase domain

172 similar to those reported in effectors from the rice blast pathogen *Pyricularia oryzae* or the  
173 corn smut fungus *Ustilago maydis* (31, 32). Intriguingly, ERC2 (FOXG\_04534) and ERC4  
174 (FOXG\_08211) both carry a predicted lytic polysaccharide monooxygenase (LPMO) domain.  
175 LPMOs cleave cellulose, chitin and other polysaccharides through a novel oxidative  
176 mechanism and have been suggested to act on crystalline surface regions of the substrate to  
177 create attachment sites and enhance accessibility for canonical glycoside hydrolases (33).  
178 LPMOs have been associated with plant pathogenicity, and pectin-cleaving LPMOs were  
179 recently shown to drive plant infection in the Irish potato famine oomycete pathogen  
180 *Phytophthora infestans* (34, 35). Thus, the four putative Fo4287 effectors detected in AF are  
181 proteins associated either with binding or modification of plant cell walls. This is in line with  
182 a recent study that identified secreted fungal proteins related with cell wall modification as  
183 genetic determinants of endophytism in phylogenetically distant members of the *A. thaliana*  
184 root mycobiome (36).

185 We noted that almost all Fo proteins secreted in root AF, including ERC1-4, are encoded on  
186 core genomic regions that are shared across the entire Fo species complex (Fig. 1E). This  
187 contrasts sharply with the previously reported SIX effector genes, which are located on lineage-  
188 specific regions (14, 15). Moreover, in contrast to most SIX effectors, ERCs have predicted  
189 homologues outside Fo, including many asco- and basidiomycete species with distinct  
190 lifestyles including both phytopathogens and non-pathogens (Fig. 1F and G; fig. S1G, table S4,  
191 Data S2 to S4). Interestingly, ERC1 and ERC2 each have a paralog in Fo4287 (FOXG\_12855  
192 and FOXG\_18882, respectively), which cluster separately and are also conserved across the  
193 entire Fo species complex, suggesting the presence of functionally diverged members of the  
194 ERC1 and ERC2 effector families (Fig. 1 F and G). FOXG\_18882 shows 56% identity to  
195 ERC2, but is much shorter (97 aa versus 253aa) and clusters with predicted homologs from *F.*  
196 *solani* and *Fo* f. sp. *melonis* (Fig. 1G). ERC3 and ERC4 homologs were also found across  
197 ascomycetes and some basidiomycete groups such as the *Agaricomycotina* and  
198 *Ustilaginomycotina*, but not in the *Pucciniomycotina* (fig. S1G, Data S4 and S5). We conclude  
199 that Fo4287 secretes an array of putative core effectors during early stages of tomato root  
200 colonization, that are conserved in diverse fungi including both pathogenic and non-pathogenic  
201 plant-associated species.

202

### 203 **ERCs are upregulated during the early biotrophic infection stage**

204 A hallmark of hemibiotrophic pathogens is a switch from biotrophy to necrotrophy  
205 coinciding with a major shift in the gene expression pattern (37). In contrast to air-borne plant

206 pathogens, the transcriptional dynamics of hemibiotrophic fungal root infection has not been  
207 explored in detail (38). Here we performed RNA sequencing (RNAseq) of tomato roots  
208 inoculated with Fol4287 during early stages of biotrophic growth in the root cortex (1, 2 and 3  
209 dpi) as well as during colonization of the root vascular tissue (7 dpi), which marks the transition  
210 from biotrophy to necrotrophy. Among the genes encoding proteins previously identified in  
211 AF (Data S1), 36 (77%) showed a marked transcriptional upregulation during early infection  
212 stages as compared to axenic growth conditions (fig. S2A). Analysis of differentially expressed  
213 genes (DEGs; log<sub>2</sub> fold change >2, P <0.05) and Principal Component Analysis revealed a  
214 major shift in the transcriptional profile, both between axenic and *in planta* conditions (Fig.  
215 2A and Data S6 to S9) as well as between early (1, 2, 3 dpi) and late (7 dpi) stages of infection  
216 (fig. S2B). The total number of DEGs ranged from 1500-1800 upregulated and 600-800  
217 downregulated genes depending on the time point (Fig. 2A). Gene ontology (GO) enrichment  
218 analysis showed an abundance of fungal transcripts involved in amino acid biosynthesis and  
219 metabolic processes during the early colonization stages (fig. S2C, Data S11), which is  
220 indicative of biotrophic growth as previously shown for the interaction between  
221 *Piriformospora indica* and *Arabidopsis* (39).

222 Around 6% (436) of the 6894 *in planta*-induced genes during the early colonization timepoints  
223 tested encode predicted secreted proteins. While many of these display fluctuations in the  
224 expression profile across the different infection stages, we also found a set of 221 genes that  
225 were significantly upregulated at all infection timepoints tested (Fig. 2B). Importantly, among  
226 the *in planta* expressed genes encoding predicted secreted proteins are previously characterized  
227 Fol4287 effectors belonging to the metalloprotease and serine protease families (40) (fig. S2D).  
228 Hierarchical clustering and expression analysis revealed two distinct patterns of expression for  
229 *in planta* upregulated genes encoding secreted proteins: 1) those showing maximum transcript  
230 levels during the early stage (1, 2 and 3 dpi) and a subsequent drop at 7 dpi, and 2) those  
231 showing a progressive induction with an expression peak at 7 dpi (Fig. 2C and D). The first  
232 category includes the *ERC* genes, among others, while the second category includes the *SIX*  
233 genes. Strikingly, most of the early upregulated genes are located on core genomic regions  
234 (except some genes located on LS chromosome 15), while the late upregulated effector genes  
235 are predominantly located on LS regions, particularly on the so-called pathogenicity  
236 chromosome 14 (Fig. 2E).

237 Regarding the expression of *ERC* genes, the results from RNAseq are generally in line with  
238 those from proteomics of AF at 3 dpi ( Fig. 1D and E). We further performed qRT-PCR analysis  
239 of genes *erc1*, *2*, *3* and *4* confirmed their upregulation *in planta* during the early infection stage

240 and the subsequent downregulation of three of the genes at 7 dpi (Fig. 2F, fig. S2E). Taken  
241 together, our results suggest that Fol4287 undergoes a major transcriptional shift between the  
242 early stage of biotrophic root colonization (1, 2, 3 dpi) and the later stage at 7 dpi coinciding  
243 with the onset of growth in the xylem. The finding that core effectors such as ERCs are  
244 specifically upregulated during the initial stage suggests a potential role in the early  
245 establishment of fungus-plant compatibility.

246

### 247 **ERCs contribute to host plant infection and suppression of root immunity**

248 To test the role of ERCs in host plant colonization and virulence, we generated isogenic  
249 Fol4287 deletion mutants lacking either the *FOXG\_11583*, *FOXG\_04534*, *FOXG\_16902* or  
250 *FOXG\_08211* gene, which were named  $\Deltaerc1$ ,  $\Deltaerc2$ ,  $\Deltaerc3$  and  $\Deltaerc4$  respectively (fig. S3A  
251 to S3E). Phenotypic analysis of these mutants revealed no detectable effect on vegetative  
252 growth, colony morphology or stress resistance on different media (fig. S3G). However, the  
253  $\Deltaerc1$ ,  $\Deltaerc2$  and  $\Deltaerc3$  mutants, caused significantly reduced mortality on tomato plants and  
254 accumulated less *in planta* fungal biomass than the Fol4287 wild type strain (Fig. 3A to C and  
255 fig. S3F, S3H and S3I). Moreover, trypan blue staining confirmed that these mutants were less  
256 efficient in colonizing tomato roots than the wild type (fig. S3J). Importantly, reintroduction  
257 of the wild type allele (fig. S3K) fully restored virulence and root colonization in the  $\Deltaerc1$ ,  
258  $\Deltaerc2$  and  $\Deltaerc3$  mutants (Fig. 3 A to C, fig. S3H and S3I).

259 TEM analysis of tomato roots inoculated with the  $\Deltaerc1$  or  $\Deltaerc2$  mutants at 3 dpi revealed a  
260 lack of penetration of root cortical cells (Fig. 3E and 3F, fig. S4B) as compared to the wild type  
261 strain where successful penetration events were frequently observed (Fig. 1B and 3D, fig.  
262 S4A). Moreover, in the  $\Deltaerc1$ -tomato interaction we noted the presence of characteristic  
263 protrusions from the cell walls of root cortex cells that encapsulated the fungal hyphae, as well  
264 as the secretion of an amorphous granular material (asterisks in Fig. 3E, arrowheads in fig.  
265 S4B). Similar structures have been reported previously in plants infected with vascular fungal  
266 pathogens such as *Fusarium*, *Verticillium* or *Ceratocystis* and were suggested to contribute to  
267 plant resistance by preventing plant cell wall degradation and inhibiting hyphal spread (41-43).  
268 In line with this idea, in contrast to the wild type strain which was detected inside the vascular  
269 bundles and parenchyma cells, the  $\Deltaerc1$  and  $\Deltaerc2$  mutants remained largely restricted to  
270 intercellular growth in the root cortex (Fig. 3E and 3F).

271 The distinct ultrastructural phenotypes of the  $\Deltaerc$  single mutants suggest that these effector  
272 proteins may have different, non-redundant roles in promoting host root colonization. To test  
273 this idea, we generated  $\Deltaerc1\Deltaerc2$  and  $\Deltaerc2\Deltaerc3$  double knockout mutants. Interestingly,



274 the  $\Deltaerc1\Deltaerc2$  strains caused slightly lower mortality compared to the wild type and  $\Deltaerc$   
275 single mutants (Fig. 3A) and was further reduced in plant colonization as determined by trypan  
276 blue staining and qRT-PCR (fig. S4C to S4E). By contrast, the  $\Deltaerc2\Deltaerc3$  double mutants  
277 displayed similar levels of virulence levels and fungal burden as the single mutants (Fig. 3C  
278 and fig. S4C to S4E). To test whether ERCs contribute to suppression of host defence, we  
279 measured the transcript levels of known plant defence genes at 2 dpi. We found a 2 to 4 fold  
280 increase in upregulation of the *pr-1*, *gluA* and *chi3* genes encoding pathogenesis-related protein  
281 1, basic  $\beta$ -1,3-glucanase and acidic chitinase, respectively (12), in tomato roots infected with  
282 the  $\Deltaerc1$ ,  $\Deltaerc2$  and  $\Deltaerc3$  mutants compared to those infected with the wild type or the  
283 complemented strains (Fig. 3G). Taken together, these results suggest that ERCs contribute to  
284 host plant infection by *Fol* and may contribute to suppression of the plant immune response .

285

### 286 **ERCs are also required for endophytic colonization and biocontrol activity of a non-** 287 **pathogenic *Fo* strain**

288 It has been known for decades that *Fo* can grow as an endophyte on roots of non-host  
289 plants without inducing detectable disease symptoms (22, 23). Moreover, certain *Fo* isolates  
290 appear to be non-pathogenic, such as *Fo47*, a well-characterized biocontrol strain that was  
291 originally isolated from a soil naturally suppressive to *Fusarium* wilt (24). *Fo47* triggers  
292 endophyte-mediated resistance (EMR) against plant pathogenic forms of *Fo* (44). Here we  
293 confirmed that co-inoculation of tomato plants with *Fo47* and *Fol4287* resulted in a marked  
294 reduction of mortality caused by *Fol4287*, as well as in a decrease of *in planta* *Fol4287*  
295 biomass, when compared to plants inoculated with *Fol4287* alone (fig. S5A to S5C). Although  
296 the hyphae of both *Fol4287* and *Fo47* were able to penetrate the root endodermis cells and  
297 grow into xylem vessels, *Fol4287* showed more profuse spread compared to *Fo47* (Fig. 4A).  
298 Interestingly, TEM analysis revealed the presence of fungal membrane tubules in penetration  
299 hyphae of *Fol4287* (Fig. 4A, fig. S5D and S5E). Similar structures were previously reported  
300 during invasive growth of plant symbionts and pathogens (45). On the other hand, we  
301 frequently observed aborted penetration events of tomato cell by *Fo47* hyphae that were devoid  
302 of cytosol (Fig. 4A, arrows; fig. S5F to S5H). In the rare occasions where *Fo47* hyphae were  
303 observed inside xylem vessels, they were often encapsulated by an amorphous granular  
304 material which also encrusted the plant cell walls and blocked the pits between the xylem vessel  
305 and adjacent cells (Fig. 4A asterisks and fig. S5I arrowheads). By contrast, such material was  
306 rarely observed in xylem vessels colonized by *Fol4287*, where hyphae successfully spread  
307 between xylem vessels (Fig 4A arrowheads and fig. S5J), and was completely absent from the

308 xylem pits of uninoculated plants (fig. S5K and S5L). The deposition of amorphous granular  
309 material, as well as phenolic infusion, lignification or incorporation of calcium into pit  
310 membranes was previously suggested to contribute to the defence against vascular wilt  
311 pathogens such as Fol, *Verticillium albo-atrum* (41) or *Ceratocystis fimbriata*, by inhibiting the  
312 spread of pathogen hyphae and preventing plant cell wall degradation (41-43). Overall, our  
313 findings indicate that the commitment of Fo towards a pathogenic or endophytic lifestyle likely  
314 occurs at the level of endodermis penetration and vascular colonization which is successfully  
315 completed by the pathogenic strain Fol4287, but are either inhibited or blocked in the  
316 endophytic isolate Fo47. Our results also confirm that the biocontrol strain Fo47 is able to  
317 colonize tomato roots to a certain extent and to protect the plant against the pathogenic form  
318 Fol4287.

319 Because ERCs are conserved across the Fo species complex including non-pathogenic  
320 forms such as Fo47, we reasoned that they might contribute to pathogenic as well as endophytic  
321 root colonization. In support of this, *erc1*, *erc2* and *erc3* were transcriptionally upregulated  
322 during early stages of tomato root colonization in the non-pathogenic isolate Fo47 (biocontrol  
323 interaction) or the banana pathogenic isolate Foc54006 (non-host interaction), as previously  
324 observed in Fol4287 (Fig. 4B to 4D and fig. S6A to S6C). Moreover, we found that the *erc1*  
325 and *erc2* orthologs of the vascular wilt pathogen *Verticillium dahliae* VdLS17 (46)  
326 (VDAG\_04446 and VDAG\_07135) were also transcriptionally induced during early stages of  
327 tomato root colonization (fig. S6D to S6F).

328 We next asked whether ERCs contribute to root colonization and biocontrol activity of  
329 the non-pathogenic isolate Fo47. Indeed,  $\Delta$ *erc1* and  $\Delta$ *erc3* deletion mutants obtained in a Fo47  
330 mClover3 background were reduced in their ability to colonize tomato roots compared to the  
331 wild type Fo47 mClover3 strain (Fig. 4G). Importantly, these mutants were also significantly  
332 less efficient in colonizing and protecting tomato plants against mortality caused by Fol4287  
333 and in reducing wilting due to the pathogenic isolate (Fig. 4E and 4F, fig. S5C). Overall, these  
334 results suggest that ERCs are used by different Fo isolates with contrasting lifestyles  
335 (pathogenic and endophytic) during early infection stages to establish associations with plant  
336 roots.

337

### 338 **ERCs contribute to Fo infection on the non-vascular land plant *Marchantia polymorpha***

339 The broad distribution of ERC homologues across the fungal kingdom suggests a  
340 conserved role of these core effectors in plant colonization. To experimentally test this idea,  
341 we took advantage of a recently established Fo infection model in the liverwort *Marchantia*

342 *polymorpha* (47), which has emerged as a non-vascular model for molecular plant-microbe  
343 interactions (48). As previously reported (47), we found that Fol4287 causes visible disease  
344 symptoms on *Marchantia* thalli and displays mostly intercellular hyphal growth similar to that  
345 observed in the cortex of tomato roots (Fig 4H and 4I). Scanning electron microscopy showed  
346 Fol4287 hyphae entering the thalli intercellularly, either by growing between cells or through  
347 air pores (Fig. 4J and fig. S7A). We also observed occasional events of direct penetration (Fig.  
348 4J). Similar to infection of tomato plants, transcript levels of the *erc1*, *erc2* and *erc3* genes  
349 were markedly upregulated during growth of Fol4287 in *Marchantia* compared to the axenic  
350 control (fig. S7B to S7D). Interestingly, *Marchantia* thalli inoculated with the Fol4287  $\Delta$ *erc1*,  
351  $\Delta$ *erc2* or  $\Delta$ *erc3* mutants showed a slight reduction in the severity of disease symptoms  
352 compared to those inoculated with the wild type strain (fig. S7E). Moreover, the fungal burden  
353 in the thalli inoculated with the  $\Delta$ *erc* mutants at 6 dpi was lower than in those inoculated with  
354 the Fol4287 wild type strain, although the difference was only significant for the  $\Delta$ *erc1* and  
355  $\Delta$ *erc3* mutants (Fig 4K). We conclude that ERCs, particularly ERC1 and ERC3, contribute to  
356 infection of Fol4287 on the non-vascular bryophyte model *M. polymorpha*.

357 Besides causing disease in plants, *F. oxysporum* has also been reported as an  
358 opportunistic pathogen of humans (49). Fol4287 was previously shown to cause mortality on  
359 immunodepressed mice and larvae of the invertebrate insect model host *Galleria mellonella*  
360 (50, 51). Here we found that mortality caused by the  $\Delta$ *erc1*,  $\Delta$ *erc2* or  $\Delta$ *erc3* mutants on *G.*  
361 *mellonella* larvae did not differ significantly from that caused by the Fol4287 wild type strain,  
362 suggesting that ERCs are dispensable for infection on animal hosts (Fig. S7F to S7H).  
363 Collectively, this data suggests that ERC effectors contribute to fungal infection on  
364 evolutionarily distant plant host lineages independent of the presence of a true vasculature.

365

## 366 **Discussion**

367 The soilborne vascular pathogen *Fo* causes systemic infections and wilting on a broad  
368 range of crops, with individual strains exhibiting exquisite host specificity determined by LS  
369 effector proteins (7). However, pathogenic isolates can also colonize roots of non-host plants  
370 without causing wilt and hence behave as endophytes (7). Such multi-host colonization must  
371 likely involve pathogen factors that are conserved across a wide range of *Fo* isolates, but the  
372 nature of these molecules has so far remained elusive. By integrating discovery proteomics  
373 with early-stage RNA-seq and targeted gene knockout analysis, we show here that colonization  
374 of multiple plant hosts by *Fo* is mediated by a set of conserved compatibility factors termed

375 Early Root Compatibility effectors (ERCs), which are encoded by core genomic regions and  
376 secreted into the root apoplast during the initial stages of infection.

377 Plant cell wall modification and modulation of apoplastic immunity appear to be essential  
378 for Fo establishment, as suggested by the large proportion of the apoplastic fungal proteome  
379 representing cell-wall modifying enzymes and small secreted proteins. A similar enrichment  
380 of cell wall degrading enzymes was also observed in the apoplastic fluid of rice leaves infected  
381 by the rice-blast pathogen *P. oryzae* or during symbiotic root interactions with the endophytic  
382 fungus *Piriformospora indica* (52, 53). Collectively, these findings suggest that cell wall  
383 modification and suppression of host immunity represent conserved fungal mechanisms for  
384 plant colonization.

385 Our transcriptomic datasets from early infection stages (1-3 dpi) identified ~230  
386 predicted secreted proteins. Interestingly, most of these early-induced effector candidates are  
387 encoded on core-genomic regions, whereas most of the late-induced genes (7dpi) are encoded  
388 on LS chromosome 14. This suggests that pathogenic lifestyle transitions in Fo are  
389 accompanied by transcriptional regulation of different waves of effectors as previously  
390 reported in the hemibiotrophic fungal pathogen *Colletotrichum* (37). Among the secreted  
391 proteins overlapping in the proteomic and transcriptomic datasets, we identified four early  
392 effector candidates which are encoded on core genomic regions and conserved across the Fo  
393 species complex as well as other fungi. These ERCs are upregulated during colonization of  
394 both host and non-host plants independently of the fungal lifestyle, indicating that they have a  
395 broadly conserved role in fungus-root associations rather than a host-specific role in vascular  
396 colonization and wilting, as described previously for the LS-encoded SIX effectors.

397 Targeted deletion of *ERC* genes in the tomato pathogenic isolate Fo4287 resulted in  
398 impaired root colonization, reduced virulence and rapid activation of plant immune responses,  
399 while in the non-pathogenic isolate Fo47 it led to a reduction in root colonization and biocontrol  
400 ability against the pathogenic Fo isolate. It is worth noting that all four ERC effectors contain  
401 predicted domains associated either with binding or modification of plant cell walls. This  
402 suggests that these effectors may either function in the mobilization of carbohydrates in the  
403 apoplast or in shielding the fungus from plant immune responses. TEM analysis of the  $\Delta\textit{erc1}$   
404 and  $\Delta\textit{erc2}$  mutants support this hypothesis as both mutants are unable to transition from inter-  
405 to intracellular growth and are blocked in the intercellular space through distinctive plant cell  
406 wall protrusions. Interestingly, a large-scale genomic analysis across diverse fungal genera in  
407 *A. thaliana* roots identified a set of proteins with cell wall modifying function as genetic  
408 determinants of endophytism (36). The precise molecular role of ERCs is currently unclear.

409 Intriguingly, a recent work in *P. infestans* showed that a secreted pectin mono-oxygenase with  
410 a LPMO domain contributes to plant infection by cleavage of pectin (35). We speculate that  
411 LPMO effectors such as ERC2 might be used by Fo to dampen recognition by the host and to  
412 cleave the polysaccharide backbone of the plant cell wall to aid pathogen accommodation.

413 We have a limited understanding on how plants engage with beneficial microbes and at  
414 the same time restrict pathogens, most likely with an immune thermostat to select for nature of  
415 the interaction (54). Recent evidence suggests that plant roots employ cell-layer-specific  
416 programs to respond to beneficial and pathogenic microbes (55). Our comparative TEM  
417 analysis of the pathogenic isolate Fo4287 and the biocontrol isolate Fo47 revealed significant  
418 differences in the ultrastructural development of the two isolates in the inner root cell layers,  
419 where growth of the Fo47 hyphae was abrogated while early growth in root cortical cells was  
420 similar between the two strains. This is in line with the finding that ERC genes are expressed  
421 predominantly during the initial infection stage and thus are likely to play a role in early root  
422 colonization which is conserved between the two fungal isolates. By contrast, host-specific LS  
423 effectors expressed at later infection stages determine entry and colonization of the vasculature  
424 and the switch to pathogenicity. Importantly, our results in the non-vascular bryophyte model  
425 *M. polymorpha* confirm that ERCs are induced during plant intercellular growth of Fo  
426 independent of vasculature signatures. The finding that some ERCs also contribute to Fo  
427 infection on this evolutionarily distant plant lineage further supports a broadly conserved role  
428 of ERCs in fungus-plant interactions.

429 Taken together, our study uncovers a suite of previously uncharacterized early root  
430 compatibility effectors, which are secreted by the vascular wilt fungus Fo during the initial  
431 asymptomatic infection stages. ERCs contribute to plant colonization by both pathogenic and  
432 non- pathogenic Fo isolates on a wide range of host and non-host plants, ranging from tomato  
433 to the liverwort *M. polymorpha* which lacks a differentiated vasculature. While the modes of  
434 action of ERCs are currently unknown, our results suggest that ERCs may target evolutionarily  
435 ancient plant processes and thus have broadly conserved roles in root-infecting fungi.

436

## 437 **Materials and Methods**

### 438 **Fungal strains and transformants**

439 Fungal strains used in this study are listed in table S2. All the generated knockouts are  
440 derivatives of *F. oxysporum* f. sp. *lycopersici* isolate 4287 (NRRL34936) or *F. oxysporum*  
441 Fo47 (NRRL54002). Strain cultures and storage were performed as described (11). Phenotypic

442 analysis of colony growth was done as previously reported (56). Targeted gene replacement  
443 with the hygromycin resistance cassette and complementation of the mutants by co-  
444 transformation with the phleomycin resistance cassette were performed as previously reported  
445 (56). Oligonucleotides used to generate PCR fragments for knockout generation by gene  
446 replacement, and complementation of mutants are listed in table S3. *F. oxysporum* gene data  
447 are available at the Fungal and oomycete Informatics Resources (FungiDB) under the  
448 following accession numbers: *erc1*, FOXG\_11583; *erc2*, FOXG\_04534; *erc3*, FOXG\_16902;  
449 *erc4*, FOXG\_08211; *ppi*, FOXG\_08379.

#### 450 **Plant growth conditions and infection assays**

451 Tomato seeds (*S. lycopersicum* cv. Monica, Syngenta) were surface sterilized in 1%  
452 sodium hypochlorite for 30 mins and potted in vermiculite (Projar, Barcelona, Spain).  
453 Seedlings were grown in a growth chamber maintained at following conditions (15/9 h  
454 light/dark cycle, 28 °C). *M. polymorpha* accession Takaragaike-1 (Tak-1; male) was used for  
455 generating *Marchantia* thalli. *M. polymorpha* gemmae were grown on plates of half Gamborg's  
456 B5 medium as described before (57).

457 Tomato root infection assays with *F. oxysporum* were performed as previously described (58)  
458 using a dipping protocol with  $5 \times 10^6$  *F. oxysporum* microconidia ml<sup>-1</sup>. Survival was recorded  
459 daily and mortality curves were plotted by the Kaplan–Meier method and compared among  
460 groups using the log-rank test. *M. polymorpha* infection with *F. oxysporum* was performed as  
461 described (47).

#### 462 ***G. mellonella* pathogenicity assays**

463 Infection assays in *G. mellonella* larvae were performed as described previously (51).  
464 Briefly, a Burkard Auto Applicator (Burkard Manufacturing, UK) with a 1ml syringe was used  
465 to inject 8 µl of the microconidial suspension ( $2 \times 10^7$  microconidia ml<sup>-1</sup> in 1x PBS) into the  
466 hemocoel. Injected larvae were incubated in ventilated glass bottles at 30 °C and survival was  
467 recorded daily. Larvae were considered dead when they displayed no movement and were  
468 melanised (fig. S7F). Mortality curves were plotted by the Kaplan–Meier method and  
469 compared among groups using the log-rank test. The experiment was performed three times  
470 with similar results. Data presented are from one representative experiment.

#### 471 **Generation of Fol-mClover3 or Fo47-mClover3 or Foc-mClover3-tagged *F. oxysporum*** 472 **transformants**

473 Plasmid pUC57 backbone carrying three copies of a *F. oxysporum* codon-optimized  
474 mClover3 (59) gene (Fo-mClover3), followed by three copies of the FLAG octapeptide tag  
475 coding region (3xFLAG) and driven by the *Aspergillus nidulans* *gpdA* promoter and the SV40  
476 late polyadenylation signal was synthesized by ProteoGenix (Schiltigheim, France). Codon-  
477 optimization of mClover3 was performed in accordance with *F. oxysporum* f. sp. *lycopersici*  
478 codon usage and GC content data retrieved from the Codon Usage Database  
479 (<http://www.kazusa.or.jp/codon/>).  
480 Fo-mClover3-labeled strains of *F. oxysporum* f. sp. *lycopersici* (NRRL 34936), *F. oxysporum*  
481 f. sp. *cubense* (NRRL54006) and the *F. oxysporum* biocontrol isolate Fo47 (NRRL54002) were  
482 obtained by co-transforming fungal protoplasts with a Fo-mClover3 expression cassette  
483 (amplified from pUC57-Fo-mClover3 plasmid with primers *gpdA*-15b + SV40 Rev) and a  
484 hygromycin resistance cassette amplified from plasmid pAN7-1 (60) with primers *gpdA*-15b  
485 + *Trpc8B*, as previously described (12). Cytoplasmic Fo-mClover3 expression was observed  
486 and quantified in at least twenty independent transformants using a Zeiss Axio Imager M2  
487 microscope (Zeiss, Barcelona, Spain) equipped with an Evolve Photometrics EM512 digital  
488 camera (Photometrics Technology, Tucson, AZ, United States) and a GFP filter set (BP  
489 450/490, FT 510, LP 515). Fungal transformants showing brightest fluorescence were used in  
490 subsequent microscopy analysis.

#### 491 **Laser scanning confocal microscopy**

492 Laser Scanning confocal microscopy was performed using a Zeiss 880 Confocal  
493 microscope with Airyscan. *S. lycopersicum* roots or *M. polymorpha* thalli inoculated with  
494 fluorescent transformants of wild-type Fol4287, Foc54006 (TR4), Fo47 or different knockout  
495 derivatives thereof expressing cytoplasmic Fo-mClover3 were visualized at an excitation of  
496 488 nm and emission detected at 495-540 nm. To visualize plant cell walls, samples were co-  
497 stained by 15 min incubation in 2 mg ml<sup>-1</sup> propidium iodide (PI) in water in the dark for 15  
498 mins before imaging. PI fluorescence was visualized at an excitation of 561 nm, and emission  
499 detected at 570-640 nm.

#### 500 **Sample preparation for TEM/ SEM analysis**

501 Sample preparation for transmission electron microscopy (TEM) was carried out  
502 according to a protocol previously reported with slight modifications (61). Briefly, roots were  
503 fixed for 90 min with 2.5% glutaraldehyde in 0.06M Sorensen phosphate buffer at pH 7.2.  
504 After 4 washes of 10 min each in the same buffer, the samples were post-fixed in 1% osmium

505 tetroxide for 90 min. Samples were then rinsed 4 times 10 min each in buffer and dehydrated  
506 in a graded series of increasing concentrations of acetone (50%, 70%, 90%, and 100%) for 20  
507 min per concentration. After dehydration samples were gradually infiltrated with increasing  
508 concentrations of EMBED812 resin (30%, 60%, and 100%) mixed with acetone for a minimum  
509 of 3h per step. Finally, samples were embedded in pure, fresh EMBED812 resin and  
510 polymerized for 48 h at 60°C. Ultrathin sections (80 nm) were cut with a Leica EM Ultracut  
511 UC7 ultramicrotome (Leica Microsystems, Vienna, Austria), post-stained 5 minutes with 1%  
512 (w/v) lead citrate dissolved in 0.6 M NaOH and subsequently 15 min with 2% (w/v) uranyl-  
513 acetate dissolved in distilled water. Sections were analyzed using a JEM1010 transmission  
514 electron microscope (JEOL, Tokyo, Japan).

515 For SEM, sample preparation was carried out as described (62) with slight modifications. Small  
516 pieces (1mm<sup>2</sup>) were cut from *Marchantia* thalli and fixed for 90 min with 2.5% glutaraldehyde  
517 in 0.06M Sorensen phosphate buffer at pH 7.2. After 4 washes of 10 min each in the same  
518 buffer, the samples were dehydrated in a graded series of increasing concentrations of ethanol  
519 (50 %, 70 %, 90 %, and 100 %) for 20 min per concentration. Dehydrated samples were critical  
520 point dried (Leica EM CPD 300; Leica Microsystems) using a customized program for plant  
521 leaves of about 80 min duration (settings for CO<sub>2</sub> inlet: speed=medium & delay=120s; settings  
522 for exchange: speed=5 & cycles=18; settings for gas release: heat=medium & speed=medium).  
523 Samples were then mounted on aluminum stubs with carbon tape and sputter coated with 10  
524 nm iridium (Leica EM ACE 600, Leica Microsystems) and imaged using a FEI Versa 3D  
525 scanning electron microscope (FEI, Hillsboro, OR, USA) under high vacuum condition.

## 526 **Quantification of gene expression and fungal burden by real-time quantitative PCR** 527 **(qRT-PCR).**

528 Real time (RT) qPCR for quantification of gene expression or of fungal biomass in *S.*  
529 *lycopersicum* or *M. polymorpha* plants was performed as described previously (47).  
530 Briefly, RNA was extracted using the Tripure RNA isolation reagent (Roche, Spain) with the  
531 DNase treatment (Roche, Spain). Reverse transcription was carried out using the Transcriptor  
532 Universal cDNA Master (Roche, Spain). qRT-PCR was performed using CFX96 Touch Real-  
533 Time PCR (Bio-Rad). Cycling conditions were 10 mins at 95°C followed by 40 cycles of 10 s  
534 at 95°C, 10 s at 62°C, and 20 s at 72°C. Data were analyzed using the  $\Delta\Delta C_t$  method (63) by  
535 calculating the ratio of the plant housekeeping genes *SlGapdh* (tomato) or *MpEF1a* (*M.*  
536 *polymorpha*) (64) versus the Fol4287-specific *six1* gene (*FOXG\_16418*) or the Fo47-specific  
537 gene on Chr7 (*FOBG\_10856*)<sup>42</sup> to calculate the fungal burden. Expression profiling of the



538 ERCs was carried out by using Fol4287-peptidyl prolyl isomerase gene (*FOXG\_08379*) (47).  
539 Moreover, the *S. lycopersicum* defense related genes were tested by using the primers from  
540 previous report (65). For expression profiling of *V. dahliae* *erc* genes VdGAPDH was used as  
541 a reference (66). All primers used for the RT- qPCR analysis are listed in table S3.

#### 542 **Isolation of tomato apoplastic fluid (AF) and fungal culture filtrate**

543 For isolation of AF, roots of 2-week old tomato plants roots were used at 72h after  
544 inoculation. AF isolation was carried out as previously described (67) with minor modification.  
545 Briefly, roots were thoroughly washed in running water and cut into pieces of 2cm length.  
546 Samples were vacuum infiltrated with deionized water 3 times for 15 min at 100 mbar with 5  
547 min atmospheric pressure breaks. Roots were then thoroughly tap dried on a tissue paper.  
548 Bundled infiltrated roots were centrifuged in 10 ml syringe barrels at 2,200 r.p.m. for 15 min  
549 at 4 °C. Pooled AF was flash frozen and stored at -80 °C.

550 To process the protein samples for LC-MS, the isolated AF was concentrated on an Amicon  
551 Ultra 0.5ml -3KDa cutoff (Merck Millipore, Germany) and the concentrate was further  
552 resolved in 20µl of 1× SDS sample buffer and 25 µl were used. Proteins were analysed by  
553 SDS-polyacrylamide (10%) gel electrophoresis with a short run, followed by Coomassie blue  
554 staining. Protein bands of 1cm block on the resolving gel were eluted and tested to identify  
555 proteins in AF. An In-gel Trypsin digestion was carried out and samples were analysed by  
556 liquid chromatography-mass spectrometry (LC-MS). Identification of tomato and *F.*  
557 *oxysporum* proteins was carried out at the RTP, Proteomics Facility, University of Warwick,  
558 UK.

559 Filtrates from axenic cultures of *F. oxysporum* secreted proteins were obtained as previously  
560 described (53). Briefly, 3-day-old cultures of Fol4287 grown in PDB or in minimal medium  
561 (MM) supplemented either with crushed roots or sucrose as carbon source were harvested by  
562 filtration, first through a cheesecloth membrane and then through a 0.45µm syringe filter  
563 (Merck Millipore, Germany). Proteins were precipitated by adding 10% (v/v, final  
564 concentration) trichloroacetic acid, incubating at -20°C overnight and subsequent  
565 centrifugation at 20,000 g. Pelleted secreted proteins were resolved in 50 µl of 1× SDS sample  
566 buffer and 25 µl were used for SDS-PAGE analysis.

#### 567 **Western Blot Analysis**

568 To exclude cytoplasmic contamination a Western blot was performed on the isolated AF  
569 along with the total root extract as positive control with tubulin antibody. For Western blot,

570 proteins from SDS-PAGE gels were transferred onto nitrocellulose membranes using the  
571 Transblot Turbo RTA Midi Transfer kit (BioRad, USA). Mouse anti- $\alpha$ -tubulin antibody  
572 (Sigma-Aldrich; #T9026) was used at a 1:5,000 dilution to determine leakage of cytoplasmic  
573 contamination into the apoplasmic fluid. The membrane was visualized using the ECL Select  
574 Western blotting detection reagent (GE Healthcare, Chicago, IL, USA) in a LAS-3000  
575 detection system (Fujifilm, Barcelona, Spain).

576

### 577 **Phylogenetic analysis and tree construction**

578

579 Protein sequences of putative effectors were obtained from the Department of Energy-  
580 Joint Genome Institute MycoCosm database (<https://mycocosm.jgi.doe.gov/mycocosm/home>).  
581 A blastp search was performed using ERC1, ERC2 and ERC3 against the MycoCosm database.  
582 For phylogenetic tree construction, protein sequences were selected based on sequence  
583 homology. Multiple sequence alignment was performed using MUSCLE (v3.8.425) with  
584 default parameters over 100 iterations (68). The phylogenetic tree was constructed with  
585 RAxML (v8.2.12) using the PROTGAMMAWAG model for protein sequence alignment (69).  
586 Bootstrap support was determined for all the phylogenetic trees with a convergence test to  
587 confirm sufficient sampling.

588

### 589 **RNAseq and data analysis**

590 Roots of 2-week-old Tomato seedlings were collected at 1, 2, 3 or 7 dpi with Fol4287.  
591 The axenic growth control was generated as follows; fresh microconidia of Fol4287 obtained  
592 from a 3-d-culture in PDB as described (56) were inoculated in 200 ml fresh PDB at a  
593 concentration of  $2 \times 10^6$  microconidia  $\text{ml}^{-1}$ . After 13 h incubation at 28°C, the germlings were  
594 harvested by filtration through a cheesecloth membrane, resuspended in 200 ml MM  
595 containing  $\text{NaNO}_3$  as nitrogen source and incubated an additional 5 h at 28°C. Germlings were  
596 then harvested and flash frozen for RNA isolation. Total RNA was isolated using the RNeasy  
597 Plant Mini Kit (Qiagen, Germany) and treated with DNase I using the Turbo DNA Free Kit  
598 (Invitrogen, Germany) according to the manufacturer's instructions. RNA sequencing was  
599 performed by Novogene, UK. For library preparation mRNA was captured through poly-A  
600 enrichment on the total RNA, and a TruSeq RNA Library Preparation Kit (Illumina, USA) was  
601 used to build the libraries according to the manufacturer's protocol. Libraries were sequenced  
602 on a NovaSeq6000 sequencing platform (Illumina). Paired-end 150-bp reads were obtained for  
603 each RNAseq library.

## 604 **Read mapping and differential expression analysis**

605 Transcript quantification was performed with Salmon (70). RNASeq paired-end read  
606 datasets were quasi mapped against the reference transcriptome of *F. oxysporum*  
607 (GCF\_000149955.1\_ASM14995v2\_rna.fna, obtained from NCBI RefSeq). Adaptor-trimmed  
608 reads have been uploaded to the ArrayExpress database. Differential gene expression analysis  
609 on gene and transcript level was analyzed using DESeq2 (1.28.1) (71), following a pair-wise  
610 comparison between *F. oxysporum* samples *in planta* as compared to the axenic growth control.  
611 GO-terms for *F. oxysporum* were obtained by processing the GCF\_000149955.1 proteins with  
612 annotF (<https://github.com/gemygk/AnnotF>), wrapping Blast (72), Blast2GO (73) and  
613 InterProScan (74) GO-term analysis was done in R using the topGO package (75) (2.40.0), by  
614 testing for enrichment in each infection timepoint as compared to the axenic growth control.  
615 Differentially expressed genes (DEGs) (absolute LFC [log<sub>2</sub> fold change] > 2 and adjusted p  
616 value <0.01) were used to create volcano plots and hierarchical clustering of samples. Secreted  
617 proteins from the DEGs were predicted with SignalP5.0 (76), using a minimal signal peptide  
618 threshold of 0.75. Heatmaps for the differentially expressed secreted genes were generated with  
619 the R heatmap package (1.0.12) using variance-stabilized counts median-centered by gene.  
620 Scripts used to analyze RNA-seq datasets and visualize differentially expressed genes are  
621 available at [https://github.com/cschu/redkar\\_et\\_al\\_erc](https://github.com/cschu/redkar_et_al_erc). Expression plots for the effectors of  
622 interest and for the amino acid transporters enriched in GO processes were done in Python by  
623 plotting the log<sub>2</sub> expression values of the candidate gene on the y-axis versus, time in dpi on  
624 the x-axis.

625 Chromosomal locations of DEGs were visualized using a custom Python script  
626 [https://github.com/cschu/chrom\\_plot](https://github.com/cschu/chrom_plot). To this aim, DEGs were assigned to three different  
627 groups: early expressed genes (average of all 3 expression values for 7 dpi/average of all 9  
628 expression values for 1-3 dpi > 0.25) and represented in red; late expressed genes (average of  
629 all 9 expression values for 1-3 dpi/average of all 3 expression values for 7 dpi < 0.25) and  
630 represented in blue; or expressed at all timepoints (DE at 7 dpi and at least one additional  
631 timepoint) and represented in green.

632

## 633 **Targeted knockouts of the *F. oxysporum* *erc* genes.**

634 Targeted gene replacement with the hygromycin resistance cassette and  
635 complementation of the mutants by co-transformation with the phleomycin resistance cassette  
636 were performed as reported previously (56). Oligonucleotides used to generate polymerase  
637 chain reaction (PCR) fragments for gene replacement, complementation or identification of

638 mutants are listed (table S3). PCR reactions were performed with a High Fidelity Phusion  
639 Polymerase (NEB, Germany), using an Mini personal thermal cycler (BioRad).

#### 640 **Statistical analysis**

641 No statistical methods were used to predetermine sample size. Statistical analysis was carried  
642 out using the GraphPad Prism 9.0 software (San Diego, USA) and the data were plotted using  
643 the same tool. For statistical analysis, all data were tested with a non-parametric or mixed one-  
644 way ANOVA analysis followed by Bonferroni's multiple comparison test or Unpaired t-test  
645 for statistical significance. Data points with different letters indicate significant differences  
646 of  $P < 0.05$  for Bonferroni's test results. Data points are plotted onto the graphs, and the  
647 number of samples or the description of error bars are indicated in the corresponding figure  
648 legends. ( $*P \leq 0.05$ ;  $**P \leq 0.01$ ;  $***P \leq 0.001$ ;  $****P \leq 0.0001$ ; otherwise, not significant)  
649 between samples. For the Kaplan-Meier plots showing comparison between percent survival  
650 of plants, log-rank (Mantel-Cox) test was performed to calculate the statistical significance  
651 ( $p < 0.05$ ) of survival compared to wild type infected plants.

#### 652 **References**

653

- 654 1. T. M. Chaloner, S. J. Gurr, D. P. Bebber, Plant pathogen infection risk tracks global  
655 crop yields under climate change. *Nature Climate Change* **11**, 710-715 (2021).
- 656 2. L. L. Presti *et al.*, Fungal Effectors and Plant Susceptibility. *Annual Review of Plant*  
657 *Biology* **66**, 513-545 (2015).
- 658 3. T. Y. Toruño, I. Stergiopoulos, G. Coaker, Plant-Pathogen Effectors: Cellular Probes  
659 Interfering with Plant Defenses in Spatial and Temporal Manners. *Annual Review of*  
660 *Phytopathology* **54**, 419-441 (2016).
- 661 4. J. D. G. Jones, J. L. Dangl, The plant immune system. *Nature* **444**, 323-329 (2006).
- 662 5. B. P. M. Ngou, H.-K. Ahn, P. Ding, J. D. G. Jones, Mutual potentiation of plant  
663 immunity by cell-surface and intracellular receptors. *Nature* **592**, 110-115 (2021).
- 664 6. R. L. Berendsen, C. M. J. Pieterse, P. A. H. M. Bakker, The rhizosphere microbiome  
665 and plant health. *Trends in Plant Science* **17**, 478-486 (2012).
- 666 7. T. R. Gordon, *Fusarium oxysporum* and the Fusarium Wilt Syndrome. *Annual Review*  
667 *of Phytopathology* **55**, 23-39 (2017).
- 668 8. R. Dean *et al.*, The Top 10 fungal pathogens in molecular plant pathology. *Molecular*  
669 *Plant Pathology* **13**, 414-430 (2012).

- 670 9. N. Ordonez *et al.*, Worse Comes to Worst: Bananas and Panama Disease—When Plant  
671 and Pathogen Clones Meet. *PLOS Pathogens* **11**, e1005197 (2015).
- 672 10. D. Turrà, M. El Ghalid, F. Rossi, A. Di Pietro, Fungal pathogen uses sex pheromone  
673 receptor for chemotropic sensing of host plant signals. *Nature* **527**, 521-524 (2015).
- 674 11. A. Di Pietro, F. I. García-Maceira, E. Méglec, M. I. G. Roncero, A MAP kinase of the  
675 vascular wilt fungus *Fusarium oxysporum* is essential for root penetration and  
676 pathogenesis. *Molecular Microbiology* **39**, 1140-1152 (2001).
- 677 12. S. Masachis *et al.*, A fungal pathogen secretes plant alkalizing peptides to increase  
678 infection. *Nature Microbiology* **1**, 16043 (2016).
- 679 13. V. Edel-Hermann, C. Lecomte, Current Status of *Fusarium oxysporum* Formae  
680 Speciales and Races. *Phytopathology* **109**, 512-530 (2019).
- 681 14. P. van Dam *et al.*, Effector profiles distinguish formae speciales of *Fusarium*  
682 *oxysporum*. *Environmental Microbiology* **18**, 4087-4102 (2016).
- 683 15. L.-J. Ma *et al.*, Comparative genomics reveals mobile pathogenicity chromosomes in  
684 *Fusarium*. *Nature* **464**, 367-373 (2010).
- 685 16. M. Rep *et al.*, A small, cysteine-rich protein secreted by *Fusarium oxysporum* during  
686 colonization of xylem vessels is required for I-3-mediated resistance in tomato.  
687 *Molecular Microbiology* **53**, 1373-1383 (2004).
- 688 17. P. M. Houterman *et al.*, The mixed xylem sap proteome of *Fusarium oxysporum*-  
689 infected tomato plants. *Molecular Plant Pathology* **8**, 215-221 (2007).
- 690 18. F. Gawehns *et al.*, The effector repertoire of *Fusarium oxysporum* determines the  
691 tomato xylem proteome composition following infection. *Frontiers in Plant Science* **6**,  
692 (2015).
- 693 19. X. Di *et al.*, Structure–function analysis of the *Fusarium oxysporum* Avr2 effector  
694 allows uncoupling of its immune-suppressing activity from recognition. *New*  
695 *Phytologist* **216**, 897-914 (2017).
- 696 20. N. Tintor, M. Paauw, M. Rep, F. L. W. Takken, The root-invading pathogen *Fusarium*  
697 *oxysporum* targets pattern-triggered immunity using both cytoplasmic and apoplastic  
698 effectors. *New Phytologist* **227**, 1479-1492 (2020).
- 699 21. J. Li, L. Fokkens, M. Rep, A single gene in *Fusarium oxysporum* limits host range.  
700 *Molecular Plant Pathology* **22**, 108-116 (2021).
- 701 22. J. G. Fuchs, Y. Moëne-Loccoz, G. Défago, Ability of Nonpathogenic *Fusarium*  
702 *oxysporum* Fo47 to Protect Tomato against Fusarium Wilt. *Biological Control* **14**, 105-  
703 110 (1999).

- 704 23. F. J. de Lamo, F. L. W. Takken, Biocontrol by *Fusarium oxysporum* Using Endophyte-  
705 Mediated Resistance. *Frontiers in Plant Science* **11**, (2020).
- 706 24. C. Alabouvette, C. Olivain, Q. Migheli, C. Steinberg, Microbiological control of soil-  
707 borne phytopathogenic fungi with special emphasis on wilt-inducing *Fusarium*  
708 *oxysporum*. *New Phytologist* **184**, 529-544 (2009).
- 709 25. J. Veloso, J. Díaz, *Fusarium oxysporum* Fo47 confers protection to pepper plants  
710 against *Verticillium dahliae* and *Phytophthora capsici*, and induces the expression of  
711 defence genes. *Plant Pathology* **61**, 281-288 (2012).
- 712 26. H. Irieda *et al.*, Conserved fungal effector suppresses PAMP-triggered immunity by  
713 targeting plant immune kinases. *Proceedings of the National Academy of Sciences* **116**,  
714 496 (2019).
- 715 27. Y.-S. Bahn, G. M. Cox, J. R. Perfect, J. Heitman, Carbonic Anhydrase and CO<sub>2</sub>  
716 Sensing during *Cryptococcus neoformans* Growth, Differentiation, and Virulence.  
717 *Current Biology* **15**, 2013-2020 (2005).
- 718 28. Z. Hu *et al.*, High CO<sub>2</sub>- and pathogen-driven expression of the carbonic anhydrase  
719  $\beta$ CA3 confers basal immunity in tomato. *New Phytologist* **229**, 2827-2843 (2021).
- 720 29. R. Lehneck, S. Pöggeler, A matter of structure: structural comparison of fungal  
721 carbonic anhydrases. *Applied Microbiology and Biotechnology* **98**, 8433-8441 (2014).
- 722 30. B. Dumas, A. Bottin, E. Gaulin, M.-T. Esquerré-Tugayé, Cellulose-binding domains:  
723 cellulose associated-defensive sensing partners? *Trends in Plant Science* **13**, 160-164  
724 (2008).
- 725 31. J. Wu *et al.*, Secreted Alpha-N-Arabinofuranosidase B Protein Is Required for the Full  
726 Virulence of *Magnaporthe oryzae* and Triggers Host Defences. *PLOS ONE* **11**,  
727 e0165149 (2016).
- 728 32. D. Lanver *et al.*, Plant Surface Cues Prime *Ustilago maydis* for Biotrophic  
729 Development. *PLOS Pathogens* **10**, e1004272 (2014).
- 730 33. G. Vaaje-Kolstad *et al.*, An Oxidative Enzyme Boosting the Enzymatic Conversion of  
731 Recalcitrant Polysaccharides. *Science* **330**, 219-222 (2010).
- 732 34. G. Jagadeeswaran, L. Veale, A. J. Mort, Do Lytic Polysaccharide Monooxygenases Aid  
733 in Plant Pathogenesis and Herbivory? *Trends in Plant Science* **26**, 142-155 (2021).
- 734 35. F. Sabbadin *et al.*, Secreted pectin monooxygenases drive plant infection by pathogenic  
735 oomycetes. *Science* **373**, 774-779 (2021).
- 736 36. F. Mesny *et al.*, Genetic determinants of endophytism in the *Arabidopsis* root  
737 mycobiome. *bioRxiv*, 2021.2004.2028.441743 (2021).

- 738 37. R. J. O'Connell *et al.*, Lifestyle transitions in plant pathogenic *Colletotrichum* fungi  
739 deciphered by genome and transcriptome analyses. *Nature Genetics* **44**, 1060-1065  
740 (2012).
- 741 38. L. Guo *et al.*, Metatranscriptomic comparison of endophytic and pathogenic *Fusarium*–  
742 *Arabidopsis* interactions reveals plant transcriptional plasticity. *Molecular Plant-  
743 Microbe Interactions*.doi:10.1094/mpmi-03-21-0063-r.
- 744 39. U. Lahrmann *et al.*, Host-related metabolic cues affect colonization strategies of a root  
745 endophyte. *Proceedings of the National Academy of Sciences* **110**, 13965-13970  
746 (2013).
- 747 40. M. K. Jashni *et al.*, Synergistic Action of a Metalloprotease and a Serine Protease from  
748 *Fusarium oxysporum* f. sp. *lycopersici* Cleaves Chitin-Binding Tomato Chitinases,  
749 Reduces Their Antifungal Activity, and Enhances Fungal Virulence. *Molecular Plant-  
750 Microbe Interactions* **28**, 996-1008 (2015).
- 751 41. G. F. Pegg, Transmission electron microscopy of *Verticillium alboatrum* hyphae in  
752 xylem vessels of tomato plants. *Physiological Plant Pathology* **8**, 221-224 (1976).
- 753 42. G.D. Bishop, R. M. Cooper, An ultrastructural study of vascular colonization in three  
754 vascular wilt diseases I. Colonization of susceptible cultivars. *Physiological Plant  
755 Pathology* **23**, 323-343 (1983).
- 756 43. L. Araujo, W. M. S. Bispo, I. S. Cacique, W. R. Moreira, F. Á. Rodrigues, Resistance  
757 in Mango Against Infection by *Ceratocystis fimbriata*. *Phytopathology* **104**, 820-833  
758 (2014).
- 759 44. M. E. Constantin, B. V. Vlieger, F. L. W. Takken, M. Rep, Diminished Pathogen and  
760 Enhanced Endophyte Colonization upon CoInoculation of Endophytic and Pathogenic  
761 *Fusarium* Strains. *Microorganisms* **8**, 544 (2020).
- 762 45. R. Roth *et al.*, Arbuscular cell invasion coincides with extracellular vesicles and  
763 membrane tubules. *Nature Plants* **5**, 204-211 (2019).
- 764 46. S. J. Klosterman *et al.*, Comparative Genomics Yields Insights into Niche Adaptation  
765 of Plant Vascular Wilt Pathogens. *PLOS Pathogens* **7**, e1002137 (2011).
- 766 47. A. Redkar *et al.*, *Marchantia polymorpha* model reveals conserved infection  
767 mechanisms in the vascular wilt fungal pathogen *Fusarium oxysporum*. *BioRxiv*,  
768 2021.2003.2020.436100, doi:10.1101/2021.03.20.436100 (2021).
- 769 48. J. L. Upson, E. K. Zess, A. Białas, C.-h. Wu, S. Kamoun, The coming of age of  
770 EvoMPMI: evolutionary molecular plant–microbe interactions across multiple  
771 timescales. *Current Opinion in Plant Biology* **44**, 108-116 (2018).

- 772 49. M. Nucci, E. Anaissie, Fusarium Infections in Immunocompromised Patients. *Clinical*  
773 *Microbiology Reviews* **20**, 695-704 (2007).
- 774 50. M. Ortoneda *et al.*, Fusarium oxysporum as a Multihost Model for the Genetic  
775 Dissection of Fungal Virulence in Plants and Mammals. *Infection and Immunity* **72**,  
776 1760-1766 (2004).
- 777 51. G. Y. Navarro-Velasco, R. C. Prados-Rosales, A. Ortíz-Urquiza, E. Quesada-Moraga,  
778 A. Di Pietro, Galleria mellonella as model host for the trans-kingdom pathogen  
779 Fusarium oxysporum. *Fungal Genetics and Biology* **48**, 1124-1129 (2011).
- 780 52. S. G. Kim *et al.*, In-depth insight into in vivo apoplastic secretome of rice-Magnaporthe  
781 oryzae interaction. *Journal of Proteomics* **78**, 58-71 (2013).
- 782 53. S. Nizam *et al.*, Serendipita indica E5'NT modulates extracellular nucleotide levels in  
783 the plant apoplast and affects fungal colonization. *EMBO reports* **20**, e47430 (2019).
- 784 54. D. Thoms, Y. Liang, C. H. Haney, Maintaining Symbiotic Homeostasis: How Do Plants  
785 Engage With Beneficial Microorganisms While at the Same Time Restricting  
786 Pathogens? *Molecular Plant-Microbe Interactions* **34**, 462-469 (2021).
- 787 55. C. Fröschel *et al.*, Plant roots employ cell-layer-specific programs to respond to  
788 pathogenic and beneficial microbes. *Cell Host & Microbe* **29**, 299-310.e297 (2021).
- 789 56. M. S. López-Berges, N. Rispaill, R. C. Prados-Rosales, A. Di Pietro, A Nitrogen  
790 Response Pathway Regulates Virulence Functions in Fusarium oxysporum via the  
791 Protein Kinase TOR and the bZIP Protein MeaB *The Plant Cell* **22**, 2459-2475 (2010).
- 792 57. S. Gimenez-Ibanez, A. M. Zamarreño, J. M. García-Mina, R. Solano, An Evolutionarily  
793 Ancient Immune System Governs the Interactions between Pseudomonas syringae and  
794 an Early-Diverging Land Plant Lineage. *Current Biology* **29**, 2270-2281.e2274 (2019).
- 795 58. A. Di Pietro, M. I. G. Roncero, Cloning, Expression, and Role in Pathogenicity of pg1  
796 Encoding the Major Extracellular Endopolygalacturonase of the Vascular Wilt  
797 Pathogen Fusarium oxysporum. *Molecular Plant-Microbe Interactions*® **11**, 91-98  
798 (1998).
- 799 59. B. T. Bajar *et al.*, Improving brightness and photostability of green and red fluorescent  
800 proteins for live cell imaging and FRET reporting. *Scientific Reports* **6**, 20889 (2016).
- 801 60. P. J. Punt, R. P. Oliver, M. A. Dingemans, P. H. Pouwels, C. A. M. J. J. van den  
802 Hondel, Transformation of Aspergillus based on the hygromycin B resistance marker  
803 from Escherichia coli. *Gene* **56**, 117-124 (1987).
- 804 61. U. K. Simon, L. M. Polanschütz, B. E. Koffler, B. Zechmann, High Resolution Imaging  
805 of Temporal and Spatial Changes of Subcellular Ascorbate, Glutathione and H<sub>2</sub>O<sub>2</sub>



- 806 Distribution during *Botrytis cinerea* Infection in *Arabidopsis*. *PLOS ONE* **8**, e65811  
807 (2013).
- 808 62. W. J. Matthaeus, J. Schmidt, J. D. White, B. Zechmann, Novel perspectives on stomatal  
809 impressions: Rapid and non-invasive surface characterization of plant leaves by  
810 scanning electron microscopy. *PLOS ONE* **15**, e0238589 (2020).
- 811 63. K. J. Livak, T. D. Schmittgen, Analysis of Relative Gene Expression Data Using Real-  
812 Time Quantitative PCR and the  $2^{-\Delta\Delta CT}$  Method. *Methods* **25**, 402-408 (2001).
- 813 64. P. Carella, A. Gogleva, M. Tomaselli, C. Alfs, S. Schornack, *Phytophthora palmivora*  
814 establishes tissue-specific intracellular infection structures in the earliest divergent land  
815 plant lineage. *Proceedings of the National Academy of Sciences* **115**, E3846-E3855  
816 (2018).
- 817 65. S. Aimé, C. Alabouvette, C. Steinberg, C. Olivain, The Endophytic Strain *Fusarium*  
818 *oxysporum* Fo47: A Good Candidate for Priming the Defense Responses in Tomato  
819 Roots. *Molecular Plant-Microbe Interactions* **26**, 918-926 (2013).
- 820 66. A. Kombrink *et al.*, *Verticillium dahliae* LysM effectors differentially contribute to  
821 virulence on plant hosts. *Molecular Plant Pathology* **18**, 596-608 (2017).
- 822 67. S. Wawra *et al.*, The fungal-specific  $\beta$ -glucan-binding lectin FGB1 alters cell-wall  
823 composition and suppresses glucan-triggered immunity in plants. *Nature*  
824 *Communications* **7**, 13188 (2016).
- 825 68. R. C. Edgar, MUSCLE: multiple sequence alignment with high accuracy and high  
826 throughput. *Nucleic Acids Research* **32**, 1792-1797 (2004).
- 827 69. A. Stamatakis, T. Ludwig, H. Meier, RAXML-III: a fast program for maximum  
828 likelihood-based inference of large phylogenetic trees. *Bioinformatics* **21**, 456-463  
829 (2004).
- 830 70. R. Patro, G. Duggal, M. I. Love, R. A. Irizarry, C. Kingsford, Salmon provides fast and  
831 bias-aware quantification of transcript expression. *Nature Methods* **14**, 417-419 (2017).
- 832 71. M. I. Love, W. Huber, S. Anders, Moderated estimation of fold change and dispersion  
833 for RNA-seq data with DESeq2. *Genome Biology* **15**, 550 (2014).
- 834 72. S. F. Altschul, W. Gish, W. Miller, E. W. Myers, D. J. Lipman, Basic local alignment  
835 search tool. *Journal of Molecular Biology* **215**, 403-410 (1990).
- 836 73. A. Conesa *et al.*, Blast2GO: a universal tool for annotation, visualization and analysis  
837 in functional genomics research. *Bioinformatics* **21**, 3674-3676 (2005).

838 74. E. Quevillon *et al.*, InterProScan: protein domains identifier. *Nucleic Acids Research*  
839 **33**, W116-W120 (2005).

840 75. A. Alexa, J. Rahnenführer, T. Lengauer, Improved scoring of functional groups from  
841 gene expression data by decorrelating GO graph structure. *Bioinformatics* **22**, 1600-  
842 1607 (2006).

843 76. J. J. Almagro Armenteros *et al.*, SignalP 5.0 improves signal peptide predictions using  
844 deep neural networks. *Nature Biotechnology* **37**, 420-423 (2019).

## 845 846 **Acknowledgements**

847 We thank M.I.G. Roncero (Universidad de Córdoba, Spain) for critical reading of the  
848 manuscript. We thank the Central Service for Research Support (SCAI) of the University of  
849 Córdoba for confocal microscopy facility. The high-performance computing resources and  
850 services in this work were supported by the Earlham Institute Scientific Computing group  
851 alongside the Norwich BioScience Institutes Partnership Computing infrastructure for Science  
852 (CiS) group.

853 **Funding:** This work was supported from the Spanish Ministry of Science and Innovation  
854 (MICINN, grant PID2019-108045RB-I00) to A.D.P. A.R. and M.S. were supported by the  
855 European Union's Horizon 2020 research and innovation program under the Marie  
856 Skłodowska-Curie grant agreements No. 750669 and 797256. A.R. also acknowledges funding  
857 from Juan de la Cierva Incorporación grant from the Spanish Research Agency (IJC2018-  
858 038468-I). C.S. was supported by BBSRC strategic funding, Core Capability Grant  
859 BB/CCG1720/1, BBS/E/T/000PR9816. Research in R.S. lab was funded by the Spanish  
860 Ministry for Science and Innovation grant PID2019-107012RB-100 (MICINN/FEDER).

## 861 862 **Author Contributions**

863 A.R. and A.D.P. conceptualized the work, designed the experiments and supervised the  
864 conducted research. A.R., M.S., B.Z., Y.K.G., M.S.L.B., S.G.I., G.V. and D.T. carried out the  
865 experiments and analysed the data. C.S. performed all the bioinformatic analysis. R.S. and  
866 S.G.I contributed in sample material and gave intellectual input for the *Marchantia* related  
867 experiments. A.R. and A.D.P. wrote the manuscript. All authors participated in reviewing and  
868 editing the final version of the manuscript.

## 869 870 **Competing interests**

871 The authors declare that they have no competing interests.

872 **Data and materials Availability**

873 All data needed to evaluate the conclusions in the paper are present in the paper and/or the  
874 Supplementary Materials. The mass spectrometry proteomics data have been deposited to the  
875 ProteomeXchange Consortium via the PRIDE partner repository. The RNA-seq datasets  
876 generated and analysed in the current study have been deposited in the ArrayExpress database  
877 at EMBL-EBI ([www.ebi.ac.uk/arrayexpress](http://www.ebi.ac.uk/arrayexpress)) (Accession numbers will be available upon  
878 acceptance of publication).

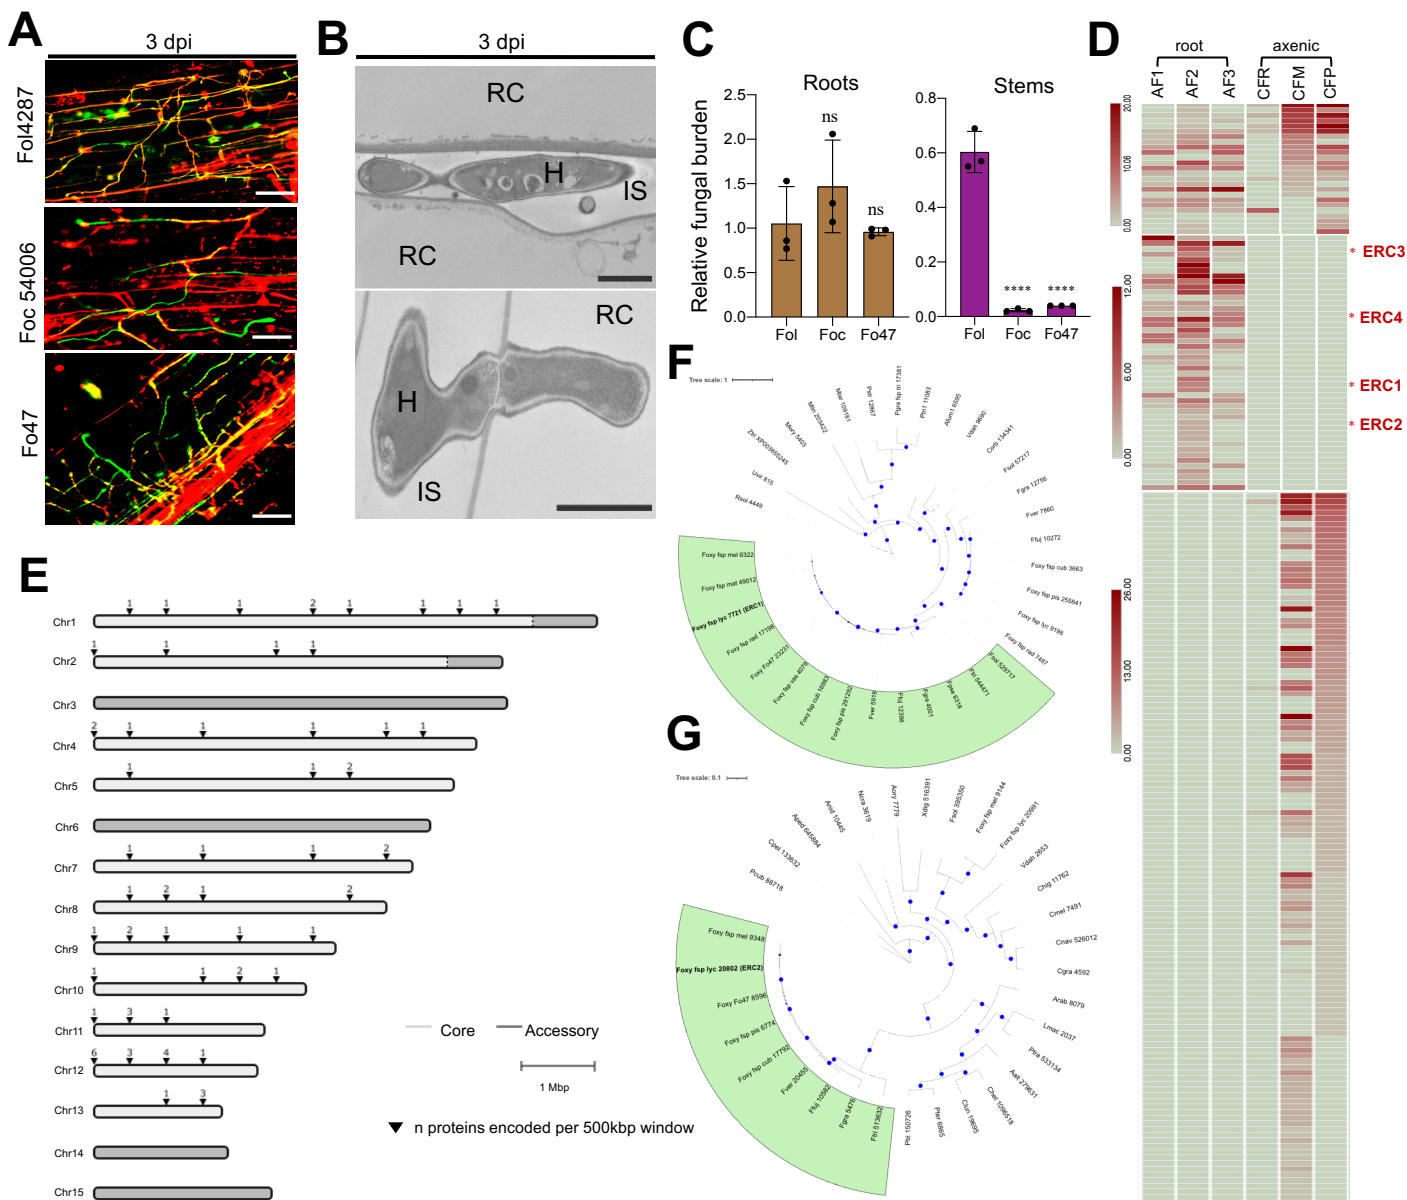

**Fig. 1. *F. oxysporum* secretes a suite of conserved core effectors in the root intercellular space.** (A) Confocal microscopy of tomato root colonization of *F. oxysporum* isolates Fol4287 (tomato pathogen), Foc54006 (banana pathogen) or Fo47 (endophyte) expressing 3xclover at 3 dpi. Fungal fluorescence (mClover3-green) is overlaid with propidium iodide staining of plant cell walls (red). Scale bars, 25  $\mu$ m. (B) TEM micrographs showing hyphae of Fol4287 (H) growing intercellularly (top) or penetrating a root cell (RC; bottom). IS, intercellular space. Scale bars, 2  $\mu$ m (top); 1  $\mu$ m (bottom). (C) Fungal burden in roots and stems of tomato plants inoculated with the indicated Fo isolates were measured by real time (qRT)-PCR of the Fo *actin* gene using total DNA extracted at 12 dpi. Fo DNA was calculated using the threshold cycle ( $\Delta\Delta$ Ct) method, normalized to the tomato *gadh* gene. Error bars indicate standard deviation (s.d.); n = 3 biological replicates. Asterisks indicate statistical significance versus Fol4287 (one way ANOVA, Bonferroni's multiple comparison test,  $p < 0.05$ ). ns = non-significant. Experiments were performed three times with similar results. (D) Heat map showing absolute counts of unique peptides of Fol4287 identified by LC-MS/MS in three independent samples of tomato root apoplastic fluid (AF) at 3dpi (AF1,2,3) or in a single sample of filtrate from axenic cultures in minimal medium with tomato crushed roots (CFR) or sucrose as carbon source (CFM) or potato dextrose broth (CFP). Putative effectors ERC1-4 are highlighted with a red asterisk. Note differences in scale between sections of the heat map. (E) Chromosomal distribution plot of the genes encoding *F. oxysporum* Fol4287 proteins identified in tomato AF, showing their localization exclusively in core genomic regions. Core and LS regions are shown in light and dark grey, respectively. (F and G) Maximum likelihood phylogenetic trees based on the aligned amino acid sequences of the FOXG\_11583 (ERC1) (F) and FOXG\_04534 (ERC2) proteins (G). Number indicates MycoCosm protein ID. Size of blue dots represents bootstrap support for the branch with maximum 100 bootstraps. Fungal species included in the analysis are listed in table S4.

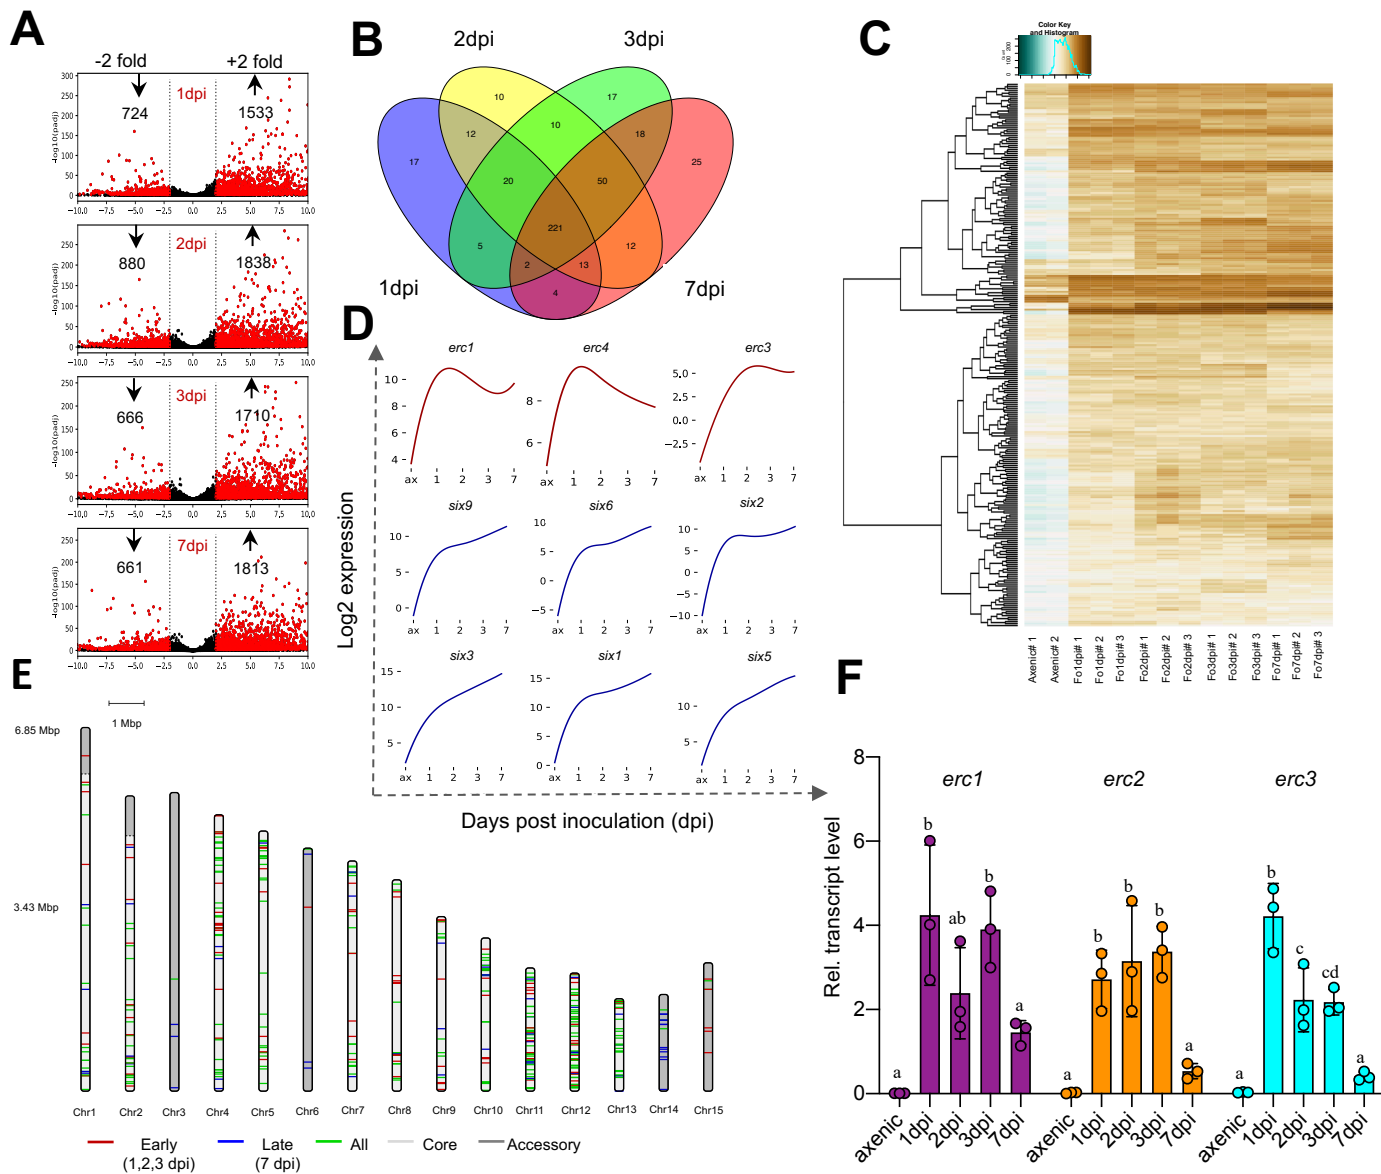

**Fig. 2. ERCs are upregulated during early biotrophic stages of infection.** (A) Volcano plot showing pairwise differential expression analysis of *Fol4287* genes at the indicated time points after inoculation in tomato roots versus axenic culture. Significantly differentially expressed genes are in red. (B) Venn diagram of *Fol4287* genes encoding predicted secreted proteins (SPs) upregulated in tomato roots at the indicated time points after inoculation versus axenic culture. A core set of 221 SPs upregulated *in planta* were identified across all the analysed timepoints. (C) Hierarchical clustering and heatmap showing log<sub>2</sub>-fold changes of *Fol4287* genes encoding secreted proteins differentially expressed in tomato roots versus axenic culture (*t* test, *P* < 0.05). Brown, upregulated genes; blue, downregulated genes. (D) Representative expression profiles of the indicated candidate effector genes plotted as log<sub>2</sub> expression versus days post inoculation (dpi). Profiles in red correspond to the indicated ERC genes located on core genomic regions, showing upregulation at early time points with a drop at 7dpi. Profiles in blue correspond to known SIX effector genes encoded on the lineage specific (LS) chromosome 14 showing maximum upregulation at 7dpi. (E) Chromosomal distribution of *in planta* upregulated *Fol4287* genes encoding predicted secreted proteins. Red bands are genes preferentially expressed at early infection stages (early to late expression ratio > 0.25). Blue bands are genes preferentially expressed at late infection stages (early to late expression ratio < 0.25). Green bands are genes expressed at both early and late infection stages (differentially expressed in at least one early plus the 7dpi dataset versus axenic). Early refers to 1-3dpi; late refers to 7dpi. Core and LS genomic regions are shown in light and dark grey, respectively. (F) Relative transcript levels of genes *FOXG\_11583* (*erc1*), *FOXG\_04534* (*erc2*) and *FOXG\_16902* (*erc3*) were measured by qRT-PCR of cDNA obtained from *Fol4287* grown in minimal medium (axenic) or from roots of tomato plants inoculated with *Fol4287* at 1, 2, 3 or 7 dpi. Transcript levels were calculated using the threshold cycle ( $\Delta\Delta C_t$ ) method and normalized to the *Fol4287* peptidyl prolyl isomerase (*ppi*) gene. Error bars indicate standard deviation (s.d.); n = 3 biological replicates. Different letters indicate statistically significant differences according to one way ANOVA, Bonferroni's multiple comparison test (*p* < 0.05).

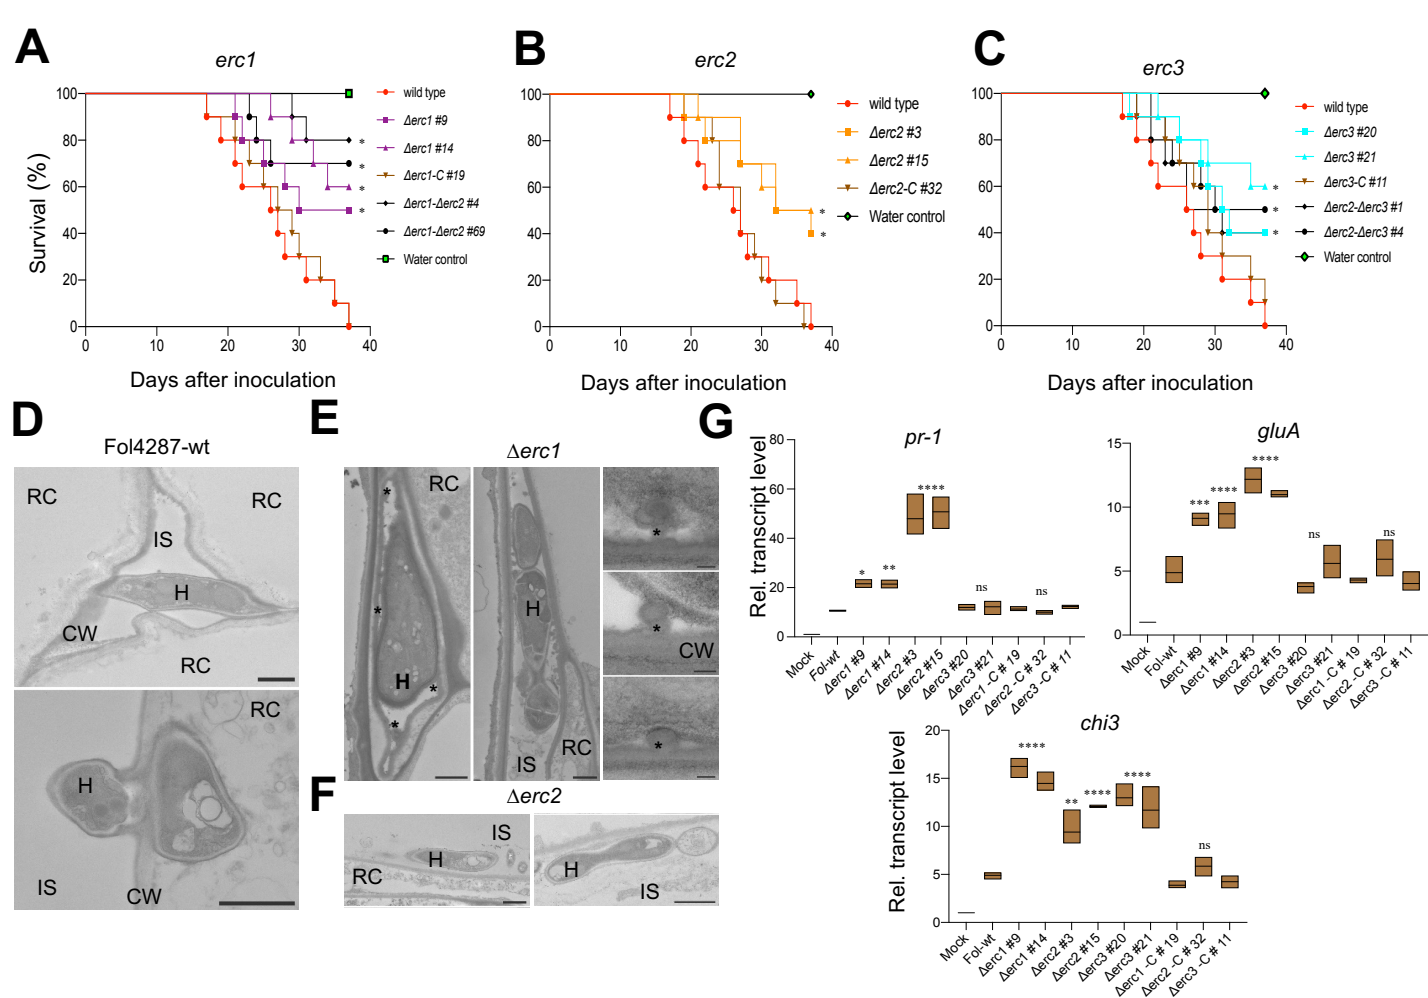

**Fig. 3. ERCs contribute to root colonization, virulence and suppression of the plant immune responses.** (A to C) ERCs have a role in virulence of *F. oxysporum*. Kaplan-Meier plot showing the survival of tomato plants inoculated with the Fol4287 wild type strain or the indicated single or double gene knockout mutants. Number of independent experiments = 3; 10 plants/treatment. Data shown are from one representative experiment. \* $P < 0.05$ , versus the wild type according to log-rank test. Note that mortality caused by the  $\Delta$ *erc1*,  $\Delta$ *erc2* and  $\Delta$ *erc3* single mutants is significantly lower than that caused by the wild type strain while mortality caused by the  $\Delta$ *erc1 $\Delta$ *erc2* and  $\Delta$ *erc2 $\Delta$ *erc3* double mutants is not significantly different from that of the respective single mutants. (D) TEM micrographs showing hyphae (H) of the Fol4287 wild type (wt) growing between (top) or penetrating into tomato root cells (RC; bottom). CW; plant cell wall, IS; intercellular space. Scale bars, 1  $\mu$ m. (E and F) TEM micrographs showing hyphae (H) of the Fol4287  $\Delta$ *erc1* (e) or  $\Delta$ *erc2* (f) mutants growing between tomato root cells (RC). Note in (E) that hyphae are encapsulated by protrusions of amorphous granular material (asterisks) and in (F) hyphae are located close to the root periphery. Scale bars in (E), 1  $\mu$ m in left and centre images; 0.1  $\mu$ m in right image; in (F) 1  $\mu$ m. (G) Transcript levels of tomato defence genes *pr-1*, *gluA* and *chi3* were measured by RT-qPCR of cDNA obtained from tomato roots at 2 days after inoculation with the indicated fungal strains. Transcript levels were calculated using the  $\Delta\Delta$ Ct method, normalized to the tomato *gadph* gene and expressed relative to those of the uninoculated control ( $H_2O$ ). Asterisks indicate statistically significant differences according to one way ANOVA, Bonferroni's multiple comparison test ( $p < 0.05$ ). Box length indicates s.d.;  $n = 3$  biological replicates. Experiments were performed three times with similar results.**

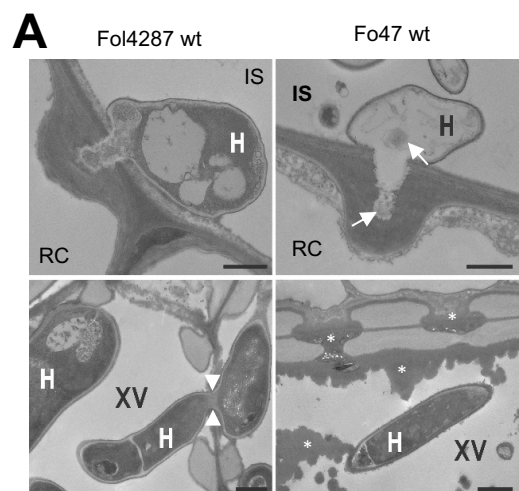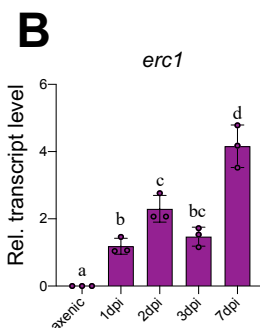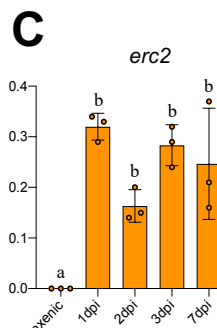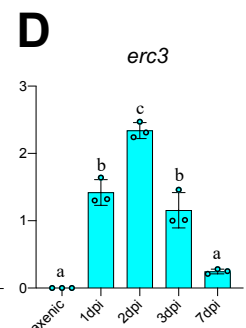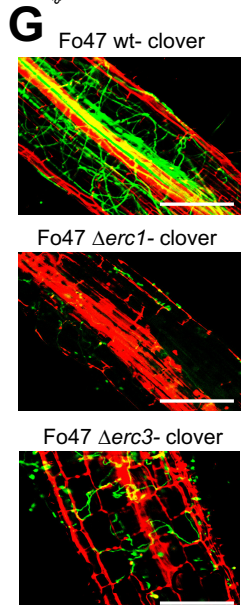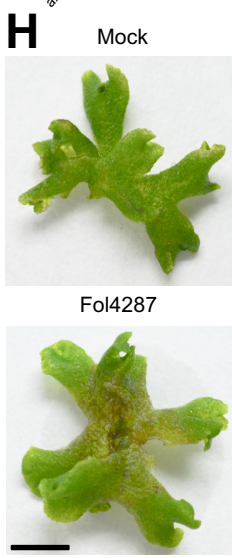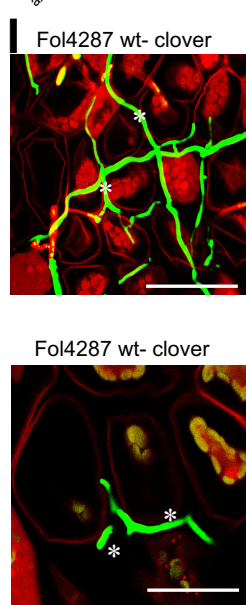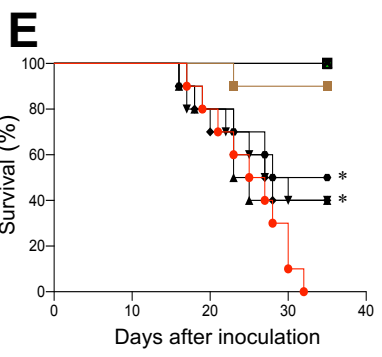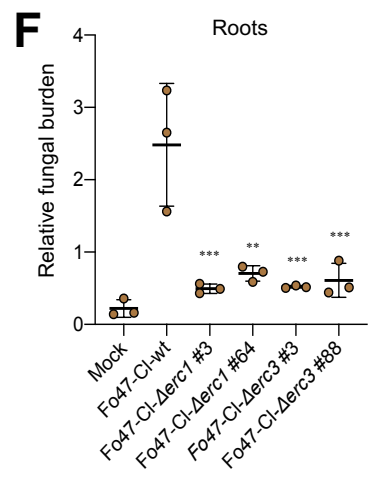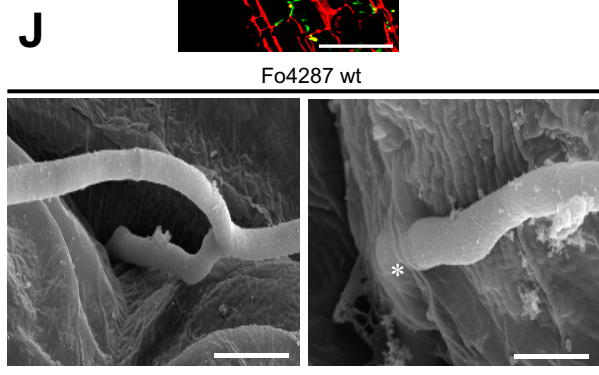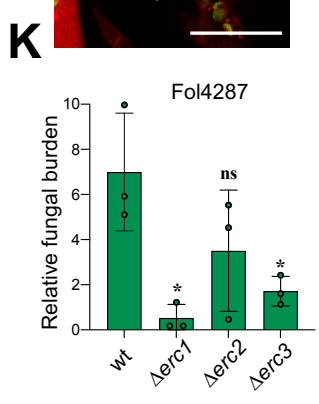

**Fig. 4. ERCs evolved as fungal compatibility factors on both host and non-host plants.** (A) TEM micrographs showing hyphae (H) of Fo4287 and Fo47 attempting penetration of tomato root cells (RC) (top) or growing inside xylem vessels (XV; bottom). Note that the penetration hypha of Fo47 is devoid of cytosol and contains only remnants of cell components (arrows). Arrowheads indicate a Fo4287 hypha penetrating an adjacent xylem vessel. Asterisks indicate the deposition of amorphous granular material encapsulating a Fo47 hypha in a xylem vessel or blocking the pits between vessels to inhibit cell-to-cell movement of the fungus. CW, cell wall; IS, intercellular space. Scale bars= 1  $\mu\text{m}$  in top images; 2  $\mu\text{m}$  in bottom images. (B to D) Relative transcript levels of the genes *FOZG\_11686* (*erc1*), *FOZG\_02496* (*erc2*) and *FOZG\_12886* (*erc3*) in isolate Fo47 (biocontrol strain) were measured by qRT-PCR of cDNA obtained from fungal mycelium grown in minimal medium (axenic) or from roots of tomato plants inoculated with Fo47 at 1, 2, 3 or 7 dpi. Transcript levels were calculated using the threshold cycle ( $\Delta\Delta\text{Ct}$ ) method and normalized to the Fo peptidyl prolyl isomerase gene (*ppi*). Error bars indicate standard deviation (s.d.); n = 3 biological replicates. Different letters indicate statistically significant differences according to one way ANOVA, Bonferroni's multiple comparison test ( $p < 0.05$ ). (E) Kaplan-Meier plot showing the survival of tomato plants inoculated with the Fo4287 or Fo47-mClover wild type strains alone or co-inoculated with Fo4287 plus Fo47-mClover wild type or the indicated Fo47-mClover  $\Delta\text{erc}$  mutants. Number of independent experiments = 3; 10 plants/treatment. Data shown are from one representative experiment. \* $P < 0.05$ , versus Fo4287 alone according to log-rank test. Note that protection provided by the Fo47-mClover  $\Delta\text{erc1}$ , and  $\Delta\text{erc3}$  mutants is significantly lower than that provided by the Fo47-mClover wild type strain. (F) Fungal burden in roots of tomato plants inoculated with the indicated Fo isolates was measured by qRT-PCR of the Fo47 specific gene (*FOBG\_10856*) using total DNA extracted at 10 dpi. Fo DNA was calculated using the threshold cycle ( $\Delta\Delta\text{Ct}$ ) method, normalized to the tomato *gadph* gene and expressed relative to that in roots inoculated with Fo47-mClover wt. Error bars indicate standard deviation (s.d.); n = 3 biological replicates. Asterisks indicate statistical significance versus Fo47-mClover wild type (one way ANOVA, Bonferroni's multiple comparison test,  $p < 0.05$ ). The experiment was performed three times with similar results. (G) Confocal microscopy images showing tomato roots inoculated with the Fo47-mClover wild type strain or the indicated Fo47-mClover  $\Delta\text{erc}$  mutants at 3 dpi. Fungal fluorescence (green) is overlaid with propidium iodide staining of plant cells (red). Scale bars, 25  $\mu\text{m}$ . (H) Macroscopic disease symptoms of *M. polymorpha* Tak-1 thalli 5 days after dip inoculation with  $10^5$  microconidia  $\text{ml}^{-1}$  of Fo4287 or water (mock). Images are representative of three independent experiments. Scale bar, 1 cm. (I) Confocal microscopy showing intercellular growth of Fo4287-mClover on a Tak-1 thallus at 3 dpi. Fungal fluorescence (green) is overlaid with propidium iodide staining of plant cells (red). Asterisks indicate intercellular hyphal growth. Scale bar, 25  $\mu\text{m}$ . (J) SEM micrographs showing hyphae (H) entering thalli of *Marchantia*, either intercellularly (arrow) or by direct penetration (asterisks). Scale bars= 5  $\mu\text{m}$  in top image; 2  $\mu\text{m}$  bottom image. (K) Fungal burden in 3-week-old *Marchantia* thalli inoculated with the Fo4287 wild type strain or the indicated  $\Delta\text{erc}$  mutants was measured by qRT-PCR of the Fo *actin* gene using total DNA extracted at 6 dpi. The relative amount of fungal DNA was normalized to the *Mp* EF1a gene. Statistical significance versus wt ( $p < 0.05$ , Unpaired t-test) is indicated by an asterisk. ns = non-significant. Error bars indicate s.d. (n = 3).
